# 1 **Vaccination of health care workers to control Ebola** 2 **virus disease**

3

4 Alexis Robert<sup>1</sup>, Anton Camacho<sup>1,2</sup>, W. John Edmunds<sup>1</sup>, Marc Baguelin<sup>1,3</sup>,  
5 Jean-Jacques Muyembe Tamfum<sup>4</sup>, Alicia Rosello<sup>3,5</sup>, Sakoba Kéïta<sup>6</sup>, Rosalind M. Eggo<sup>1\*</sup>

6

7 1. London School of Hygiene & Tropical Medicine, Keppel St. London. WC1E 7HT UK

8 2. Epicentre, Paris, France

9 3. Public Health England, 61 Colindale Avenue, London, NW9 5EQ

10 4. Institut National de Recherche Biomédicale, Democratic Republic of the Congo

11 5. Institute of Health Informatics, Farr Institute of Health Informatics Research, UCL,

12 London NW1 2DA, UK

13 6. Ebola Response, Ministry of Health, Conakry, Guinea

14

15 \*corresponding author:

16 Rosalind M Eggo

17 r.eggo@lshtm.ac.uk

18

19 Keywords: health care workers, Ebola, transmission modelling, vaccination, outbreak  
20 control.

## 21 **Abstract**

### 22 **Background**

23 Health care workers (HCW) are known to be at risk of infection during Ebola virus  
24 disease outbreaks, particularly during the early phase when the disease may not have  
25 been confirmed or protective measures are not yet implemented. Therefore, vaccination  
26 of HCW is currently being considered as a public health intervention, both for personal  
27 protection, and to limit outbreak spread. There have not yet been mathematical  
28 modelling studies of such interventions, which can integrate both the direct and indirect  
29 effects of vaccination to fully quantify their effect.

### 30 **Methods**

31 We studied the dynamics of HCW infections during the 1995 Kikwit outbreak in the  
32 Democratic Republic of Congo, and during the 2013-16 West Africa outbreak. We  
33 generated a mathematical model that includes different rates of transmission for  
34 community and HCW, and the effect of control measures and behavioural change during  
35 the outbreak. We generalised the model to explore an higher transmission regime that  
36 more closely resembles the patterns seen in the West African outbreak, and assessed the  
37 impact of vaccination strategies targeting key groups.

### 38 **Findings**

39 We found that vaccination of health care workers ahead-of-time can greatly diminish the  
40 size and duration of outbreaks, but the benefit is dependent on the degree of community  
41 transmission. When within-community transmission is sustained, vaccination of the  
42 community is required to shorten the outbreak, and decrease the number of cases.

### 43 **Interpretation**

44 Vaccination of HCW ahead-of-time can be a useful strategy for combating Ebola virus  
45 disease outbreaks, especially when coupled with other interventions. Vaccination of  
46 HCW after an outbreak has started is likely to have little effect on overall transmission,  
47 but may help protect HCW.

## 48 **Research in context**

### 49 **Evidence before this study**

50 There are still no licensed vaccines for use against EVD. However, the results of the  
51 Guinea ring vaccination trial raises the possibility that vaccines can be used to control  
52 future outbreaks. Although health care workers (HCW) are known to be at risk during  
53 Ebola virus disease (EVD) outbreaks, there is no direct evidence of the effect of  
54 vaccinating HCW to mitigate outbreaks.

### 55 **Added value of this study**

56 Mathematical models can be useful tools to help draw together evidence and project the  
57 likely impact of different interventions. We developed a model of community and HCW  
58 transmission and fitted it to the best available outbreak data. We assessed the impact of  
59 vaccination strategies targeting HCW and community members, to quantify the impact  
60 of vaccination.

### 61 **Implications of all the available evidence**

62 We found that vaccination of HCW ahead-of-time can diminish the size and duration of  
63 outbreaks, as well as protecting the HCW themselves. The overall effect is dependent on  
64 the degree of within-community transmission. Reactive vaccination in response to an  
65 outbreak is likely to be much less effective at protecting HCW.

## 66 **Introduction**

67 Since 1976, sub-Saharan Africa has been affected by more than 25 Ebola virus disease  
68 (EVD) outbreaks. The largest of these, the 2013-16 West African outbreak, resulted in  
69 more than 28,000 reported cases in Liberia, Sierra Leone and Guinea [1]. Several studies  
70 reported that the incidence of EVD among health care workers (HCW) was higher than  
71 in the general population [2][3][4][5], as in other outbreaks [6]. Since HCW are  
72 frequently in contact with patients, they are at high risk of infection, especially before  
73 personal protective equipment is in use [7]. Furthermore, due to high rates of contacts  
74 within care facilities, and high-risk medical activities, HCW may transmit infection to  
75 their patients [7] or others in the community. For instance, in the outbreaks from the  
76 Democratic Republic of Congo (DRC) where the occupation of cases was reported,  
77 between 17 and 27% were HCW [8].

78  
79 Mathematical models can be used to gain insight into the key drivers of outbreaks, and  
80 to anticipate the consequences of potential control measures [9] [10]. Numerous  
81 mathematical modelling studies of EVD have provided critical insight into transmission  
82 dynamics and interventions [9], [11], [12][13] [14][15]. Few mathematical models have  
83 studied HCW, despite strong evidence that these individuals are at high risk during EVD  
84 outbreaks [2] [3][4][16]. The successful conclusion of the Guinea Phase III ring vaccine  
85 trial [17] raises the possibility that vaccines will be used to help mitigate future EVD  
86 outbreaks. Understanding the role of HCW in EVD transmission is crucial to properly  
87 assess the potential benefit of vaccination of HCW, so that appropriate decisions can be  
88 made once an EVD vaccine is available.

## 89 **Methods**

90 To determine the role that HCW play in transmission of EVD it is necessary to have - as a  
91 minimum - data on the occupation of each case. Such data are not available for many  
92 previous outbreaks [6]. The detailed dataset collected during the 1995 Kikwit outbreak  
93 in DRC does, however, provide an opportunity to quantify the role of HCW in the spread  
94 of that epidemic. To help generalise the results to other settings, we also developed a  
95 scenario that is informed by the transmission pattern in Guinea during the 2013-16  
96 West African outbreak, where a lower fraction of cases were HCW and there was  
97 evidence of greater community transmission (Figure 1). The development of these  
98 scenarios is described below.

99

## 100 **Kikwit outbreak data**

101 Between January and July 1995, an outbreak of EVD occurred in Kikwit, DRC (Figure  
102 1a)[6]. From January to April, there were infrequent cases in rural areas surrounding  
103 the city before introduction to Kikwit General Hospital on April 7<sup>th</sup> (Supplementary  
104 Section S1). Haemorrhagic fever was diagnosed on May 2<sup>nd</sup>, and on May 10<sup>th</sup>  
105 international assistance was initialised. Confirmation of EVD occurred on May 8<sup>th</sup>, and  
106 further control measures started on May 12<sup>th</sup>. The final case died on July 16<sup>th</sup>, giving 317  
107 cases reported, 248 deaths, and a case-fatality ratio of 78% [18].

108

109 We used the following data available from a line list of EVD cases: their occupation  
110 (either HCW, or non-HCW, which we called “community”); the occupation of their likely  
111 infector (obtained by real-time epidemiological investigation); their date of onset, and  
112 date of recovery or death. There was some missing data in each field (Supplementary  
113 Section S1). We censored cases with symptom onset before April 7<sup>th</sup>, when the first case  
114 was admitted to Kikwit General Hospital, which results in 284 cases, of whom 73 were  
115 HCW (26%). For 191 cases, a likely named infecting individual and their occupation was  
116 available. We therefore computed eight daily time series: 6 time series of symptom  
117 onset date stratified by case and infector occupation, and two time series of deaths  
118 stratified by case occupation. We assumed the probability of recording onset date did  
119 not depend on time, location or occupation.

120

121 Kikwit had an approximate population of 200,000 in 1995 [19], and 429 HCW were  
122 employed at Kikwit General Hospital [20], which was the largest of its two hospitals. By  
123 2003, 1047 HCW were employed in these two hospitals [21]. There was no information  
124 on the total number of HCW in other health care facilities surrounding Kikwit, therefore,  
125 based on this evidence we estimated there were 900 HCW in Kikwit in total in 1995. Our  
126 findings were not sensitive to this assumption (Supplementary Section S4.9).

127

## 128 **Transmission Model**

129 We developed a deterministic compartmental model of EVD transmission stratified by  
130 occupation, where the population is either HCW ( $h$ ) or community ( $c$ ) (Figure 2). On  
131 infection, cases leave the susceptible compartment,  $S$ , and enter an incubation period  
132 that follows an Erlang distribution with shape 2 and mean  $\epsilon^{-1}$ , which is a more  
133 biologically realistic distribution than an exponential distribution [27]. Following the  
134 latent period, individuals become infectious and symptomatic ( $I$ ), and recover ( $R$ ) or die

135 (D). We did not have specific information about funeral transmission in Kikwit, and thus  
136 we considered that all transmission events occurred while in the  $I$  compartment. Finally,  
137 for each population (HCW and community) we tracked the source of infection and so we  
138 defined four time-dependent transmission rates:  $\beta_{t,ij}$ , where infectious,  $i$ , and susceptible,  
139  $j$ , are  $c$  or  $h$ . The equations of the model are displayed in Supplementary Section S3.2.

140

141 To account for the effect of control measures such as the arrival of new protective  
142 equipment for HCWs, the opening of isolation wards, population awareness of the  
143 disease, and the communication campaign in the population, we used flexible  
144 occupation-specific time-dependent decreasing functions for  $\beta_{t,ij}$ , modelled by a sigmoid  
145 function:

$$\beta_{t,ij} = \beta_{t_0,ij} \left( 1 - \frac{\delta_k}{1 + e^{-\alpha_k(t-T_k)}} \right)$$

146 where  $k = h$  if either  $i$  or  $j$  is  $h$ , and  $k = c$  otherwise, and  $t$  is measured in days. The force  
147 of infection  $\lambda_{t,ij} = \beta_{t,ij}(I_i/N_j)$ . Where  $N_j$  is the total population size of HCW (900) or  
148 community members (200,000).

149

## 150 **Parameter inference**

151 We used a Bayesian framework to fit the model to the eight time series, using  
152 Metropolis-Hastings Markov chain Monte Carlo, and a negative binomial likelihood [28]  
153 [29](Supplementary section S3.2). We fixed the CFR, and the fraction of onset and death  
154 dates recorded for each occupation class to the observed values, and estimated their  
155 overdispersion parameters. There was no significant difference between occupations in  
156 completeness of dates, so we used the same fractions and CFR for HCW and community  
157 infections. The mean times from onset to recovery or death were fixed using estimates  
158 from the data (Table 1). We used flat priors for the transmission rates, overdispersion  
159 and sigmoid function parameters, and the number of exposed and infected individuals at  
160 the start of the study period (Supplementary section S4.2). Using the posterior  
161 distribution of the transmission parameters through time, we calculated the  
162 reproduction number for each route of infection ( $R_{ij}$ ), and the net reproduction number  
163 ( $R_n$ ) using the next generation matrix (Supplementary section S3.1).

164

## 165 **Transmission regimes in other outbreaks**

166 The outbreak in Kikwit was brief in comparison with the 2013-16 West Africa epidemic.  
167 In the recent outbreak, outside of large cities the typical transmission pattern was for

168 overlapping outbreaks on the order of months occurring in many geographic regions  
169 (Supplementary section S2). Daily case incidence from three exemplar regions, one in  
170 Guinea (Figure 1c), Sierra Leone (Figure 1b), and Liberia (Figure 1d), show a similar  
171 pattern to that seen in Kikwit, namely a fairly short outbreak, with a high proportion of  
172 HCW infected early in the outbreak (Supplementary section S2). However, the Guinea  
173 time-series show sustained transmission in the community, which is not observed in  
174 Kikwit. In Liberia, the epidemics more closely resemble the Kikwit outbreak. In Sierra  
175 Leone, the longer outbreak in Kenema has a high fraction of HCW infected, especially  
176 early, although the percentage is not as high as the other examples. In all three settings,  
177 although data is available on occupation of cases, the records are less complete than in  
178 Kikwit, and do not provide infector-infectee pairs.

179

180 Since data from West Africa did not provide the same detailed information on  
181 transmission routes as in Kikwit, it was not possible to use the same modelling  
182 framework to study both epidemics. Therefore, we modified the model, so that it was  
183 applicable to a broader transmission regime that was not amplified by HCW-mediated  
184 transmission. We removed time dependencies in transmission changes inferred from  
185 Kikwit, and because there was better evidence of sustained community transmission in  
186 West African outbreaks, this regime has a within-community reproduction number with  
187 mean = 1.5, similar to values inferred in other studies [13][30][31]. We altered the  
188 between-occupation reproduction numbers to prevent HCW-mediated transmission  
189 from driving the epidemic. This allowed us to quantify the role of HCW vaccination  
190 under broad, but justifiable, modes of transmission in the population. We used the  
191 uncertainty in estimates inferred from the Kikwit data in the higher transmission  
192 scenario. To allow close comparison, we simulated this “prolonged-transmission”  
193 scenario in the same population size as the Kikwit simulations.

194

## 195 **Vaccination strategies**

196 We extended the model to include vaccination of HCW and community populations and  
197 compared the impact of different vaccination strategies using stochastic simulations. We  
198 considered the following strategies: i) reactive mass vaccination of the population,  
199 prioritising HCW, with a prime-boost vaccine (strategy a), or a single dose vaccine  
200 (strategy b); ii) ahead-of-time vaccination of HCW, with three levels of coverage: 10%  
201 (strategy c), 30% (strategy d), or 50% (strategy e); iii) combined strategies of ahead-of-  
202 time vaccination of HCW at three levels of coverage plus reactive mass vaccination of

203 remaining HCW and the community (strategies f, g, and h). We selected values of  
204 coverage that were realistic given high HCW turnover in recently affected countries [32]  
205 [33], and the possibility of waning of protection.

206

207 For single-dose vaccine, efficacy was 90% ( $v_p=0.9$ ) and protection is reached after one  
208 week; for prime-boost vaccine the efficacy was 90% ( $v_b=0.9$ ), where 50% was reached  
209 one week after prime ( $v_p=0.5$ ), and boost is given two weeks after prime. Vaccination  
210 reduces susceptibility by  $(1 - v_p)$  or  $(1 - v_b)$  compared with unvaccinated individuals. The  
211 rate of mass vaccination,  $\tau$ , was equivalent to vaccination of 15,000 people per day,  
212 which is an operational value supplied by field teams. Vaccination proceeded until the  
213 whole population was vaccinated, and was the same rate for single dose and prime-  
214 boost vaccination.

215

## 216 **Stochastic simulation of vaccination**

217 We sampled 600 parameter sets from the joint posterior distribution and for each set  
218 we generated 15 stochastic simulations. We compared the distribution of the number of  
219 cases generated in the set of simulations, and the time to extinction (no individual left  
220 infected or exposed). We assessed the effect of different vaccination strategies by  
221 comparing to the baseline simulation, and reported median and 95% credible intervals  
222 (CI) for these distributions.

223

224 All simulated reactive mass vaccination scenarios began vaccination on day 20 (April  
225 27<sup>th</sup>), which is when health authorities were first alerted to an outbreak of bloody  
226 diarrhoea [18]. This was earlier than detection of EVD in Kikwit, but to ensure that our  
227 results are relevant to the current context, we assumed that surveillance systems have  
228 been enhanced since 1995, and therefore EVD would be detected more quickly. In  
229 ahead-of-time vaccination schemes the number of exposed and infected HCW at the  
230 start of the epidemic simulation were drawn from independent Poisson distributions  
231 with means equal to  $(1-v_p)E_{och}(T_0)$ ,  $(1-v_p)E_{ohh}(T_0)$  and  $(1-v_p)I_h(T_0)$ , and values drawn  
232 from the joint posterior distribution.

233



## 234 **Results**

### 235 **Transmission parameters**

236 Our model captured the dynamics of EVD in Kikwit for each route of transmission  
237 (Figure 3 and Supplementary section S6). We found that the initial reproduction  
238 numbers involving HCW as index case were high (Table 2). In contrast, the within-  
239 community reproduction number was less than one, and therefore transmission was not  
240 sustainable. Although there was a low per capita rate of transmission from the  
241 community to HCW, this represents a considerable risk to HCW: on average, each eight  
242 community cases caused one HCW infection. Overall, the reproduction number at the  
243 start of the study was 2.98 (2.11-4.36), with a major contribution from HCW, despite  
244 their low number.

245

246 The timing and shape of the decrease in transmission rate depended on the occupation  
247 of the case (Figure 3 and Table 2). We inferred an early and rapid decrease in HCW-  
248 related transmission. This estimate is consistent with epidemiological reports of this  
249 outbreak: clinical diagnosis of viral haemorrhagic fever was established in early May. In  
250 contrast, we find the within-community parameters change several weeks later. The  
251 overall reproduction number fell below one after 30 (27-35) days (Figure 3d), and so  
252 the epidemic began to decrease.

253

254 At the start of the study we estimated that there were 23 (14-36) community and 10 (5-  
255 18) HCW exposed or infectious across all simulations. These results suggest EVD was  
256 present in Kikwit before 7<sup>th</sup> April (day 0).

257

### 258 **Simulations without vaccination**

259 Stochastic simulations in the Kikwit scenario resulted in 288 (180-406) cases (observed  
260 value = 284), and the final case was reported on day 115 (93-155) (Figure 4). As  
261 described, we defined the prolonged-transmission scenario with sustained community  
262 transmission, and a later change in behaviour (Table 2). In the prolonged-transmission  
263 scenario the outbreak was larger (900 cases (430-1306)) and the epidemic lasted longer  
264 (137 (115-181) days).

265

266 In the baseline simulation, 70 (41-105) HCW are infected in the Kikwit transmission  
267 regime (observed value = 73), whereas 267 (125-548) HCW are infected in the

268 prolonged-transmission regime (Figure 5). This represents 30% (14-61%) of all HCW in  
269 the simulation.

270

### 271 **Ahead-of-time vaccination of health care workers**

272 In both transmission regimes, the effect of ahead-of-time HCW vaccination on total  
273 number of cases depended on the coverage achieved, where coverage is either due to  
274 staff turnover since vaccination, or waning of protection (Figure 5). 50% coverage of  
275 HCW decreased the total number of cases (Kikwit: 121 (50-240), prolonged-  
276 transmission: 277 (130-528)) but did not markedly shorten the outbreaks. However, the  
277 total number of HCW infected was much higher in the prolonged-transmission regime  
278 (42 (10-118) compared with 17 (3-39) in the Kikwit scenario) (Figure 5).

279

280 At lower coverage of HCW, there is less impact on the total number of cases or duration,  
281 but this intervention decreases the number of cases in HCW (Figure 5). In strategies  
282 with 10% or 30% coverage, there was a small decrease in the time to extinction and  
283 total number of cases. Simulated outbreaks resulted in 244 (101-427) in and 174 (69-  
284 327) cases respectively in the Kikwit scenario, and a similar incremental percentage of  
285 cases was averted in the high transmission scenario (Supplementary section S4.5).

286

287

### 288 **Reactive mass vaccination**

289 In the Kikwit scenario, reactive mass vaccination was of limited benefit either to the  
290 entire population (Figure 5a) or to HCW (Figure 5b). The single dose reactive mass  
291 vaccination strategy resulted in 63 (25-110) fewer cases. Since the decrease in HCW  
292 transmission inferred in the model ( $T_h$ ) occurred early, reactive vaccination - even when  
293 HCW were prioritised - did not reduce the number of HCW infected.

294

295 In contrast, in the prolonged-transmission scenario, vaccination substantially decreased  
296 the total number of cases. There were 487 (246-989) fewer cases in the entire  
297 population, as well as 193 (69-434) fewer cases in HCW. This difference was driven by  
298 prioritisation of HCW for vaccination, and because rapid mass vaccination quickly  
299 decreased within-community transmission.

300

301 In both scenarios, the single dose vaccine resulted in fewer cases than prime-boost, due  
302 to the two-week delay until the boost dose, although the difference was fairly small: 19  
303 (3-43) cases in Kikwit, and 96 (41-184) in the prolonged-transmission regime.

304

305

### 306 **Combined vaccination strategies**

307 In combination strategies we found a decreased number of cases in both HCW and the  
308 population as a whole, and an earlier time of epidemic extinction for all values of  
309 coverage in both transmission regimes (Figure 5).

310

311 In Kikwit, greater than 30% coverage in HCW resulted in the 95% CI of simulated values  
312 excluding the median number of the baseline simulation, and the outbreak was shorter  
313 than the baseline (extinction on day 96 (72-135)). There is little additional benefit to  
314 HCW of combined strategies, compared with ahead-of-time HCW vaccination, because  
315 the reactive campaign begins too late to protect unvaccinated HCW.

316

317 In the prolonged-transmission scenario, for all values of HCW coverage the 95% CI  
318 excluded the baseline median (900 cases), and baseline lower CI (430 cases). The time-  
319 to-extinction is reduced for all levels of coverage, but the 95% CI do not exclude the  
320 median of the baseline. In contrast to the Kikwit scenario, the combination strategies  
321 provide extra protection to HCW directly, because reactive campaigns prioritise HCW,  
322 and thus reduce transmission between HCW.

323

324 These results suggest combined strategies can decrease the number of cases, even at  
325 low HCW coverage, especially in prolonged-transmission scenarios, when coupled with  
326 the change in transmission rate in the model.

327

## 328 **Discussion**

329 Using a model of EVD transmission stratified by occupation and route of transmission,  
330 we have investigated the likely impact of HCW vaccination strategies during outbreaks.

331

332 In transmission regimes that resemble the outbreak in Kikwit – where the community  
333 reproduction number was below 1 throughout the epidemic and HCW appeared to have  
334 catalysed transmission into the community – ahead-of-time vaccination of HCW can

335 have an outsize impact on the number of cases. Direct protection of HCW may prevent  
336 their infection by hospitalised cases, and decrease their role in further spread. In these  
337 scenarios, where spread is more dependent on the health care setting and perhaps,  
338 therefore more amenable to rapid decreases in transmission, there are limited  
339 additional benefits of reactive mass vaccination, both in number of cases averted, and  
340 the duration of the outbreak. Indeed, the model suggests that ahead-of-time vaccination  
341 of health care workers, even at modest coverage (30% immunised) is more effective  
342 than mass vaccination in response to such outbreaks. Ahead-of-time health care worker  
343 vaccination strategies require many fewer doses than mass vaccination strategies.

344

345 In the prolonged-transmission scenario, within-community transmission is above the  
346 epidemic threshold, and HCW act in a similar manner to community members, with no  
347 early decrease in HCW-related transmission rate. In transmission regimes like this,  
348 ahead-of-time vaccination of HCW can still provide individual protection to HCW and  
349 have a modest impact on overall transmission. However, reactive community  
350 vaccination is more effective under these circumstances as this helps to reduce the  
351 within-community reproduction number to less than one. It is of note that the total  
352 number of HCW infected in the prolonged-transmission scenario is vastly higher than in  
353 the Kikwit scenario because HCW remain at high risk of infection, even if they are not  
354 catalysing the outbreak, because of the much larger within-community epidemic. In  
355 prolonged-transmission scenarios, combined strategies give the largest reduction in  
356 cases.

357

358 In all modeled scenarios, ahead-of-time vaccination of HCW provided direct protection  
359 for HCW, and decreases the number of cases in HCW. In this model, we could not  
360 distinguish 30% protection of 100% of HCW from 100% protection of 30% of HCW.  
361 Therefore we used the effective vaccine coverage of HCW. Further information on the  
362 likely protective effect of available vaccines may allow more specific examination of this  
363 distinction.

364

365 The data from Kikwit are the best available for analysis of HCW transmission, because  
366 the occupation, plus the likely source of infection are given for most cases, and dates of  
367 symptom onset and death or recovery are by day. However, there are some missing  
368 data, and the suggested routes of infection may not be complete. We do not consider  
369 transmission after death, which could affect the estimates of transmission rate. Our  
370 methods assumed that individuals mix randomly within occupation groups, and there is

371 no heterogeneity within groups. Despite these limitations, the general conclusions are  
372 robust to the precise value of the number of HCW, and the transmission values used in  
373 vaccination simulations. No such detailed data are available from the West African  
374 outbreak. Instead, we had to construct a scenario that approximated the epidemiological  
375 situation in which HCW played a less significant role in transmission, and community  
376 transmission was higher. The observed patterns seen in West Africa lie between these  
377 two scenarios, where HCW are at high risk of infection, but there is evidence of longer  
378 sustained transmission in the community, although on a local level are somewhat more  
379 similar to the Kikwit transmission regime. Therefore these scenarios can be viewed as  
380 the range of expected effects of health care worker vaccination. Collecting and  
381 publishing more detailed information on the route of transmission in future EVD  
382 outbreaks would greatly improve our understanding of the epidemiology of this disease  
383 and the potential benefits that might accrue from control measures targeted at different  
384 transmission routes.

385

386 In conclusion, ahead-of-time HCW vaccination decreases the number of cases seen, by  
387 directly protecting vaccinated HCW, and indirectly protecting non-vaccinated HCW and  
388 the community. Reactive mass vaccination strategies may be required to control the  
389 outbreak when within-community transmission is intense.

390

391

## 392 **Contribution of authors**

393 AR<sup>1</sup>, RME, AC and WJE developed the analysis plan; JJMT, AR<sup>2</sup> and KS collected and  
394 cleaned data from 1995 Kikwit outbreak, and 2013-2016 Guinea outbreak; AR<sup>1</sup>  
395 implemented the analysis and ran the model, with contribution from AC; AR<sup>1</sup> and RME  
396 interpreted the results, wrote the first draft and the supplemental material. AC, WJE, MB,  
397 AR<sup>2</sup>, JJMT, KS contributed to the manuscript. All authors approved the final version.

398

## 399 **Acknowledgments**

400 We acknowledge Sebastian Funk for technical support. AR<sup>1</sup> is supported by the  
401 Norwegian Institute for Public Health “A randomised trial of ring vaccination to evaluate  
402 Ebola vaccine efficacy and Safety in Guinea, West Africa”. AC is funded by the Medical  
403 Research Council (MR/J01432X/1). AR<sup>2</sup> was supported by the Fischer Family Trust and  
404 MB by the National Institute for Health Research Health Protection Research Unit in  
405 Immunisation at the London School of Hygiene & Tropical Medicine in partnership with

406 Public Health England. RME and WJE were supported by the Innovative Medicines  
407 Initiative 2 (IMI2) Joint Undertaking under grant agreement EBOVAC1 (grant 115854).  
408 The IMI2 is supported by the European Union Horizon 2020 Research and Innovation  
409 Programme and the European Federation of Pharmaceutical Industries and  
410 Associations. The views expressed are those of the authors and not necessarily those of  
411 the funders. The funders had no role in study design; in the collection, analysis, and  
412 interpretation of data; in the writing of the report; or in the decision to submit the paper  
413 for publication.

414

### 415 Declaration of Interests

416 RME and WJE were supported by the Innovative Medicines Initiative 2 (IMI2) Joint  
417 Undertaking under grant agreement EBOVAC1 (grant 115854). The IMI2 is supported  
418 by the European Union Horizon 2020 Research and Innovation Programme and the  
419 European Federation of Pharmaceutical Industries and Associations

420

421

### 422 Figure Legends

423

424 Figure 1. A) Daily incidence time series of EVD onset during the 1995 EVD outbreak in Kikwit  
425 (population≈200,000), stratified by occupation. The red line marks the start date of the study. B)  
426 Weekly incidence time series of reported EVD onset in Kenema, Sierra Leone in 2014-15 (population-  
427 609,873 [22], C) Daily incidence time series of EVD onset in Macenta prefecture, Guinea in 2014-15  
428 (population=278,456 [23]), D) daily incidence time series of EVD onset in Bong County, Liberia in 2014  
429 (population=328,919 [24]). All are stratified by occupation, and inset shows cumulative proportion of  
430 HCW infected during the outbreak. Data from Sierra Leone are from [25], from Guinea are from the  
431 Guinean Ministry of Health patient database, and from Liberia from a curated database of public  
432 reports [26].

433

434

435 Figure 2. Schematic of the model structure. The population is stratified by occupation, so  $i$  and  $j$  are  
436 HCW ( $h$ ) or community members ( $c$ ). Individuals begin susceptible to infection ( $S_i$ ), and on infection  
437 they enter an exposed class ( $E_i$ ) split by the route of infection ( $E_{ib}$ ,  $E_{ji}$ ). There are 2 sequential  $E$   
438 compartments so that the duration of the latent period is Erlang-distributed (see Methods). After the  
439  $E_2$  compartments, individuals enter the infectious compartment ( $I_i$ ), and then die ( $D_i$ ) or recover ( $R_i$ ).  
440 The force of infection,  $\lambda$ , depends on the route of transmission. When vaccination campaigns are  
441 implemented, susceptible individuals can enter the prime ( $V_{p,i}$ ) and boost ( $V_{b,i}$ ) compartments, and  
442 are then subject to a lower force of infection equal to  $1 - \text{vaccine efficacy}$  ( $v_p$  or  $v_b$ ).

443

444 Figure 3. Posterior model fit for daily community onset (A) and HCW onset (B), showing observed data  
445 from Kikwit (black), posterior mean (solid), median (dashed), 50% CI (dark) and 95% CI (light). Note  
446 that model is fitted to 8 time series (Supplementary Section S4.1), but aggregated incidence plots are  
447 given here for clarity. Model-inferred posterior reproduction number trajectories where community  
448 members are infected (C) and HCW are infected (D). In C) the HCW-to-community reproduction  
449 number (dark) and community-to-community (light) are given with mean and 50% and 95% CI. D) In

450 D) the HCW-to-HCW reproduction number (dark) and community-to-HCW reproduction number  
451 (light) decrease at the same time,  $T_h$ . The horizontal dashed line indicates the epidemic threshold,  
452 when  $R=1$ . The overall reproduction number combines all four reproduction number trajectories (E).  
453 Inset figures on C, D, and E show the corresponding trajectories for the prolonged-transmission  
454 regime. This scenario used the uncertainty and correlation structure of the relatively low-transmission  
455 Kikwit scenario, but had higher values of community-to-community transmission, and did not feature  
456 HCW as “catalysers” of the epidemic.

457

458

459 Figure 4. Simulated epidemics under the baseline scenario without vaccination (grey), and with three  
460 vaccination scenarios (colours). A and B show incidence and cumulative number of cases in the Kikwit  
461 scenario, for HCW and community members combined. C and D show under the prolonged-  
462 transmission regime. Note different y-axis.

463

464

465 Figure 5. Summary statistics of the stochastic simulations generated for each scenario. Number of  
466 cases in the entire population (A), number of cases in the 900 simulated HCW (B), and time to  
467 extinction (C) in the Kikwit scenario; Number of cases in the entire population (D), number of cases in  
468 the 900 simulated HCW (E), and time to extinction (F) in the prolonged-transmission scenario.  
469 Simulations without vaccination are shown in grey, and each colour represents a vaccination strategy:  
470 reactive mass vaccination with (a) prime-boost vaccine or (b) single dose vaccine; ahead-of-time HCW  
471 vaccination only, with coverage in HCW of (c) 10%, (d) 30% or (e) 50%; ahead-of-time HCW  
472 vaccination plus reactive mass vaccination, with coverage in HCW of (f) 10%, (g) 30% or (h) 50%. Note  
473 different y-axes.

474

475

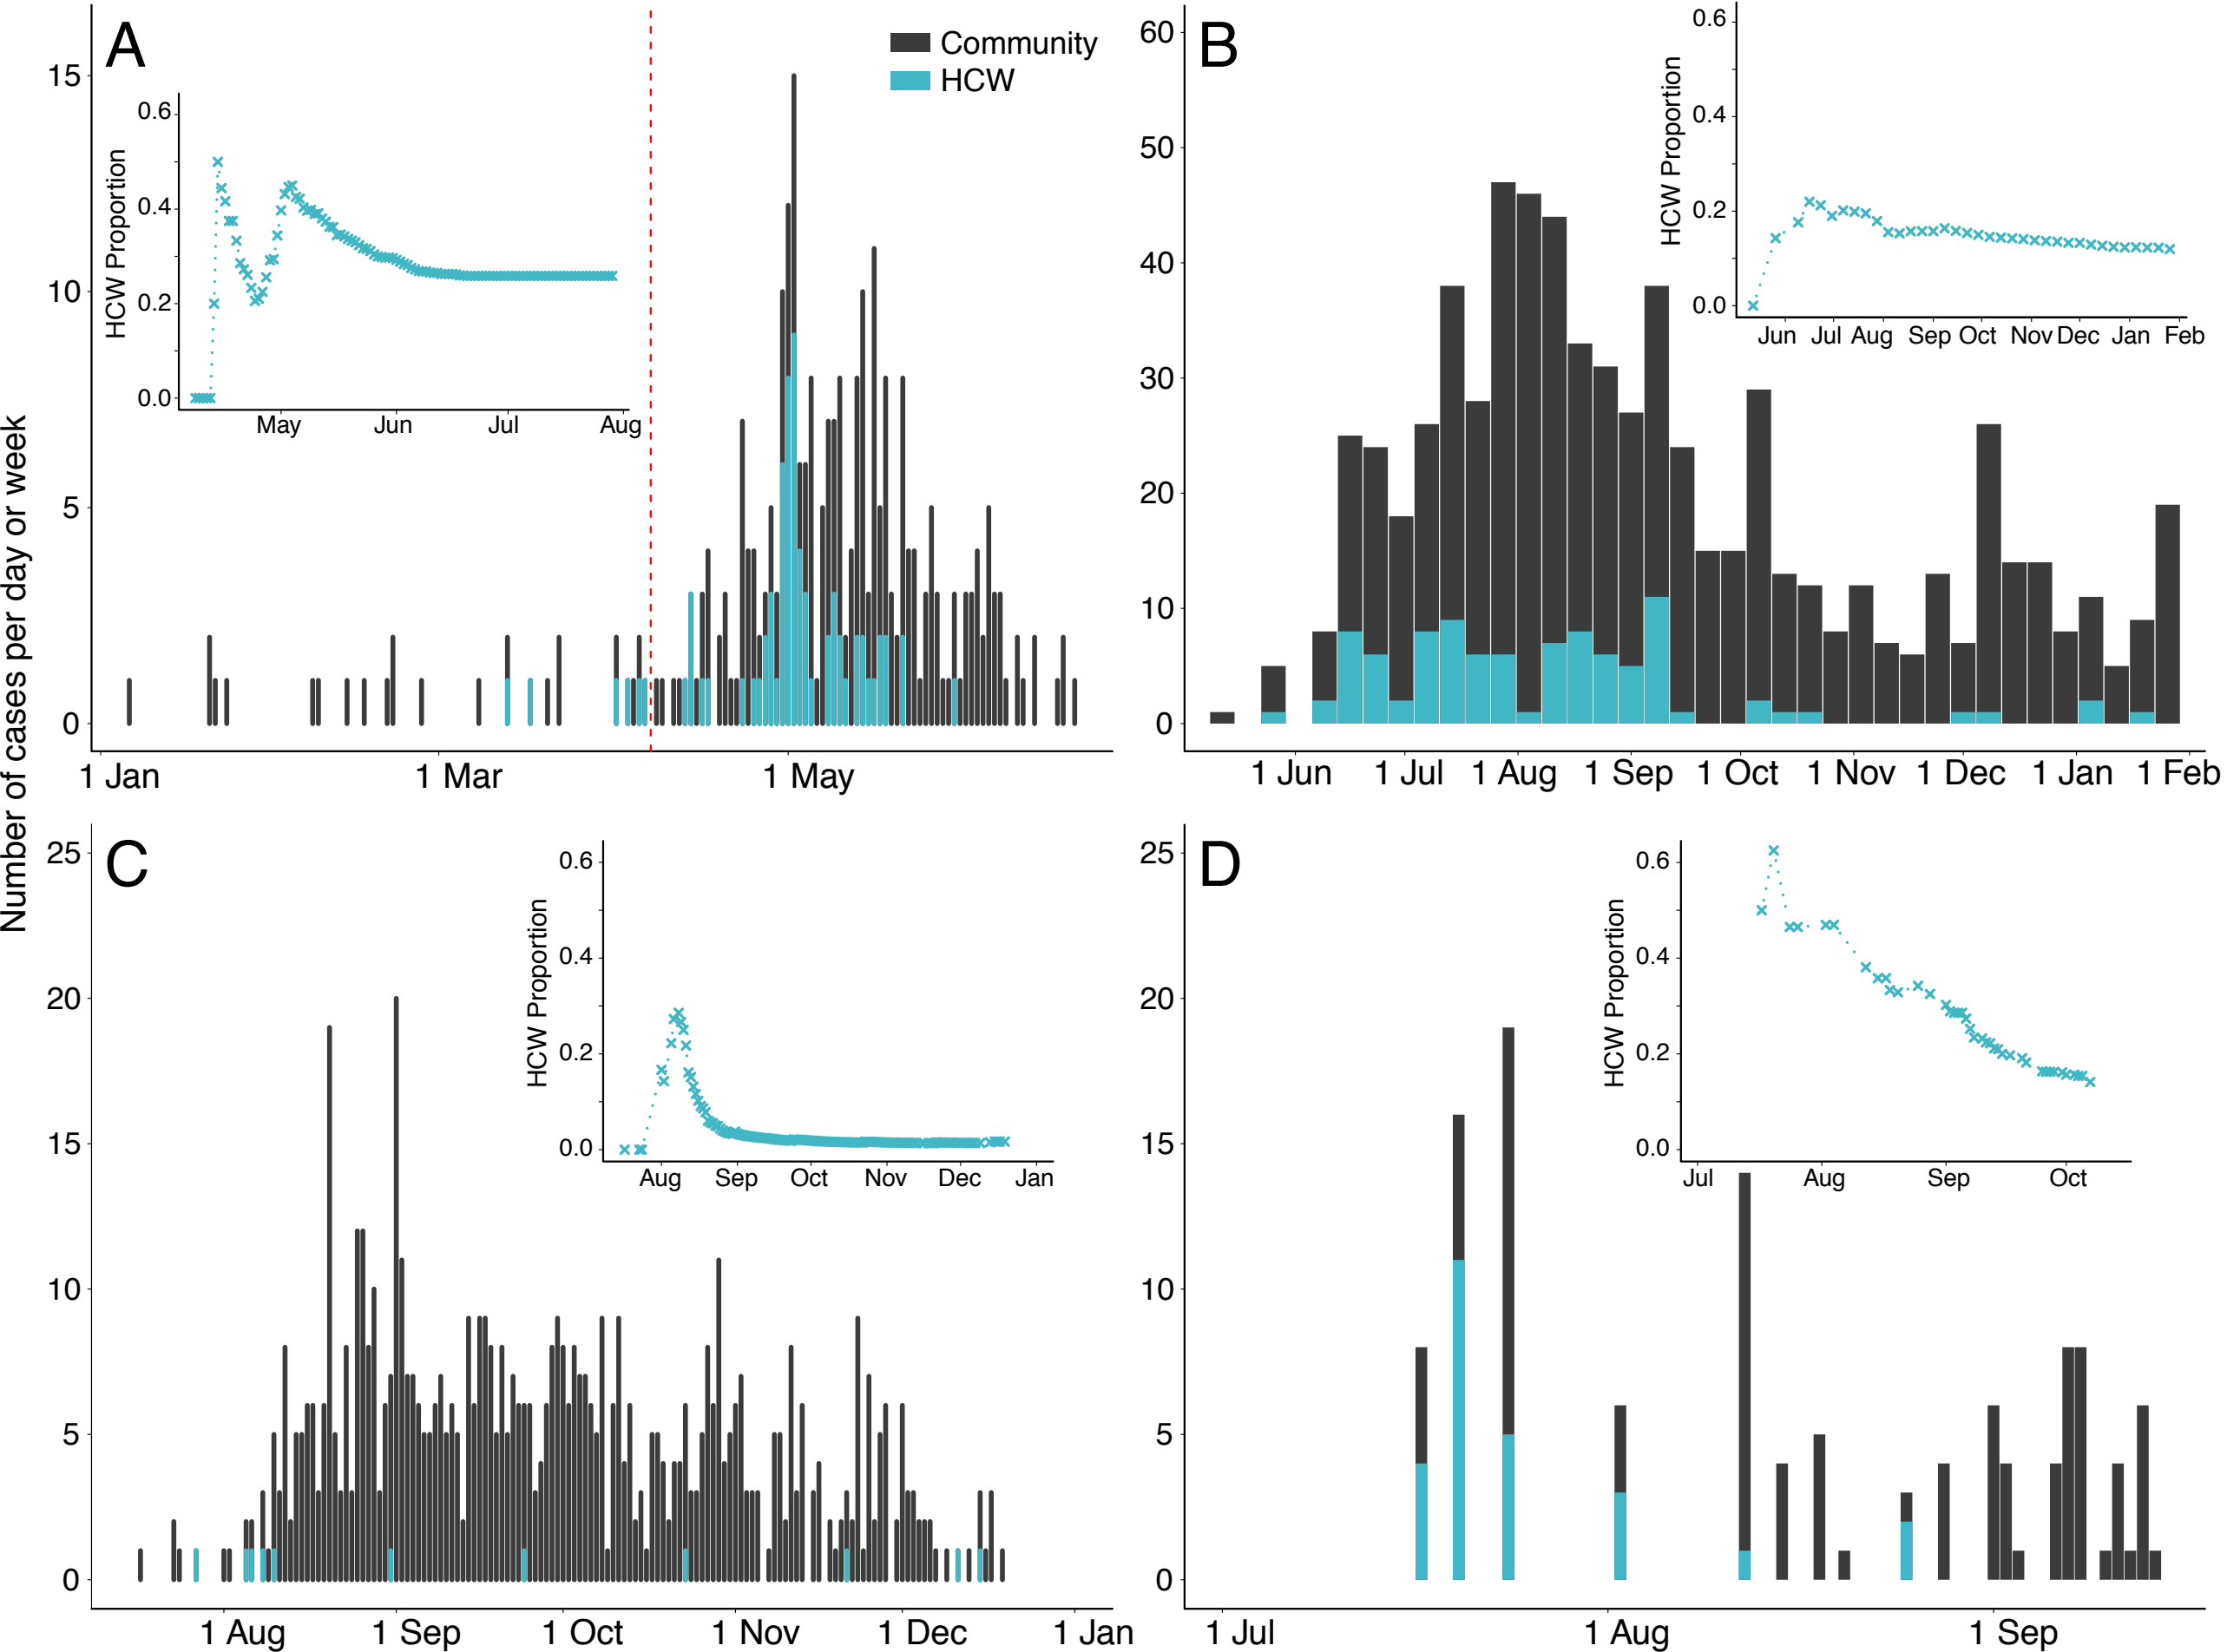



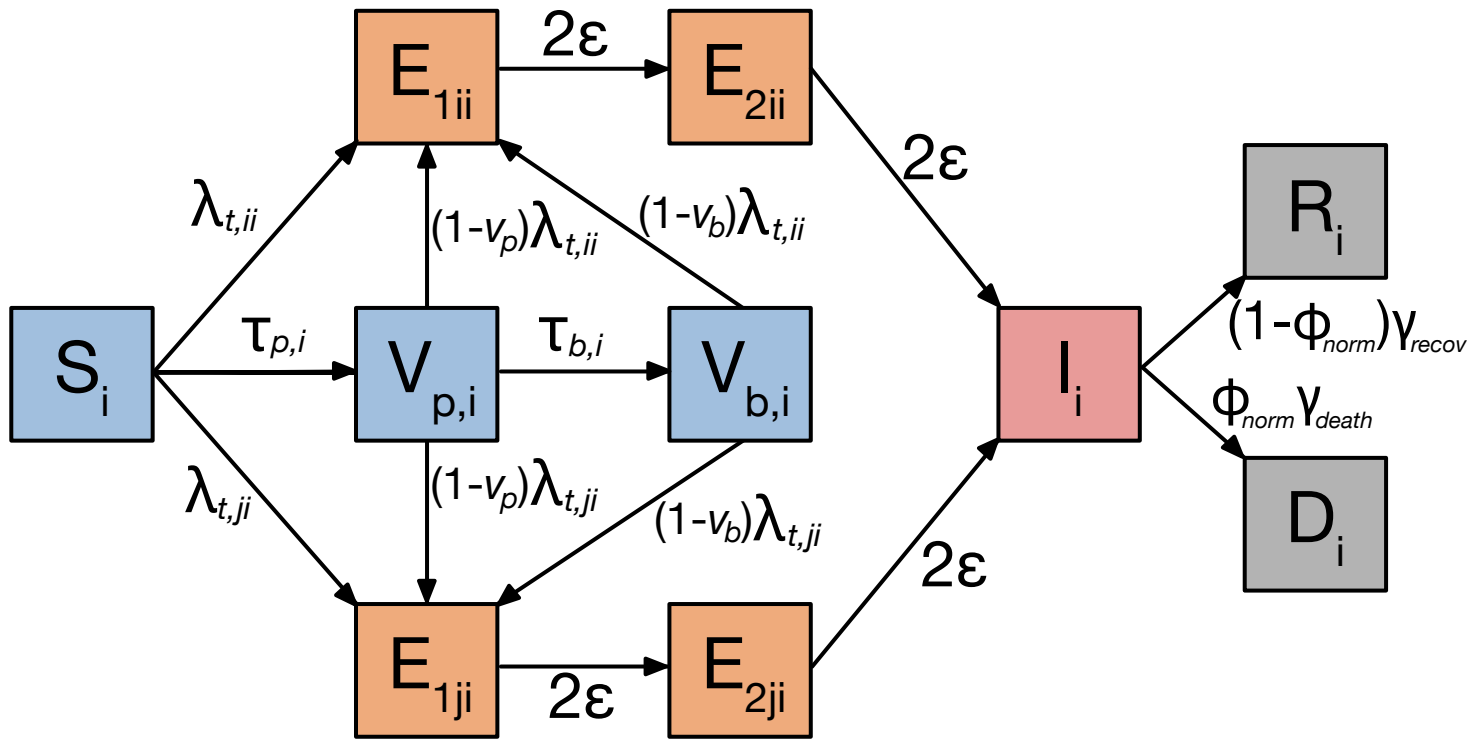

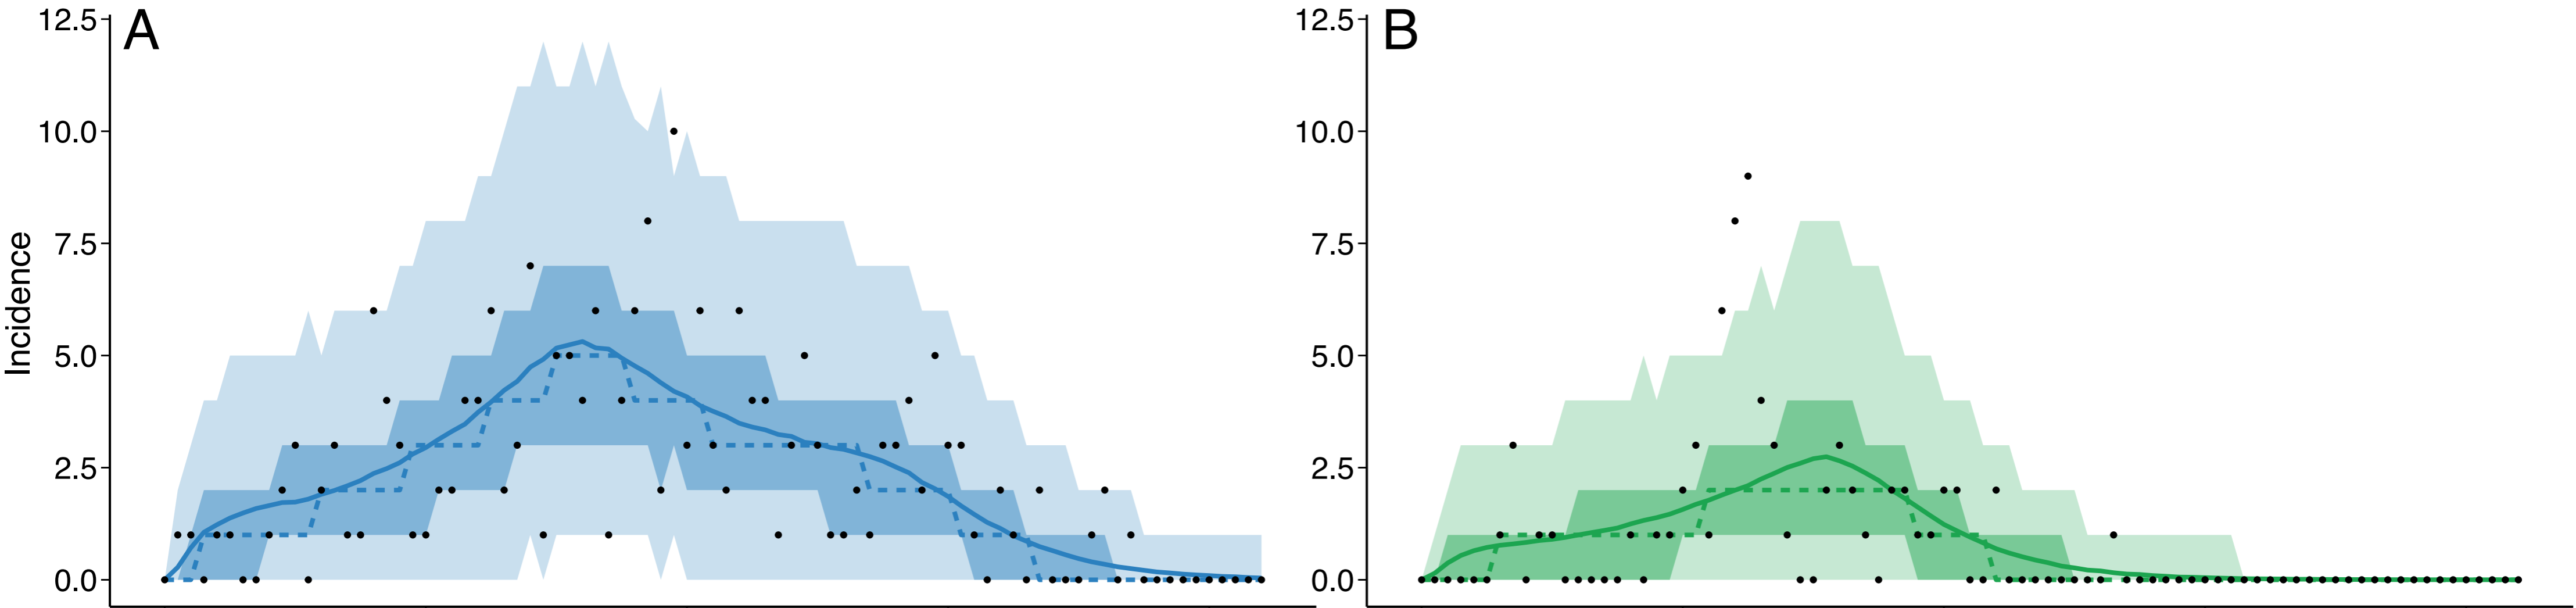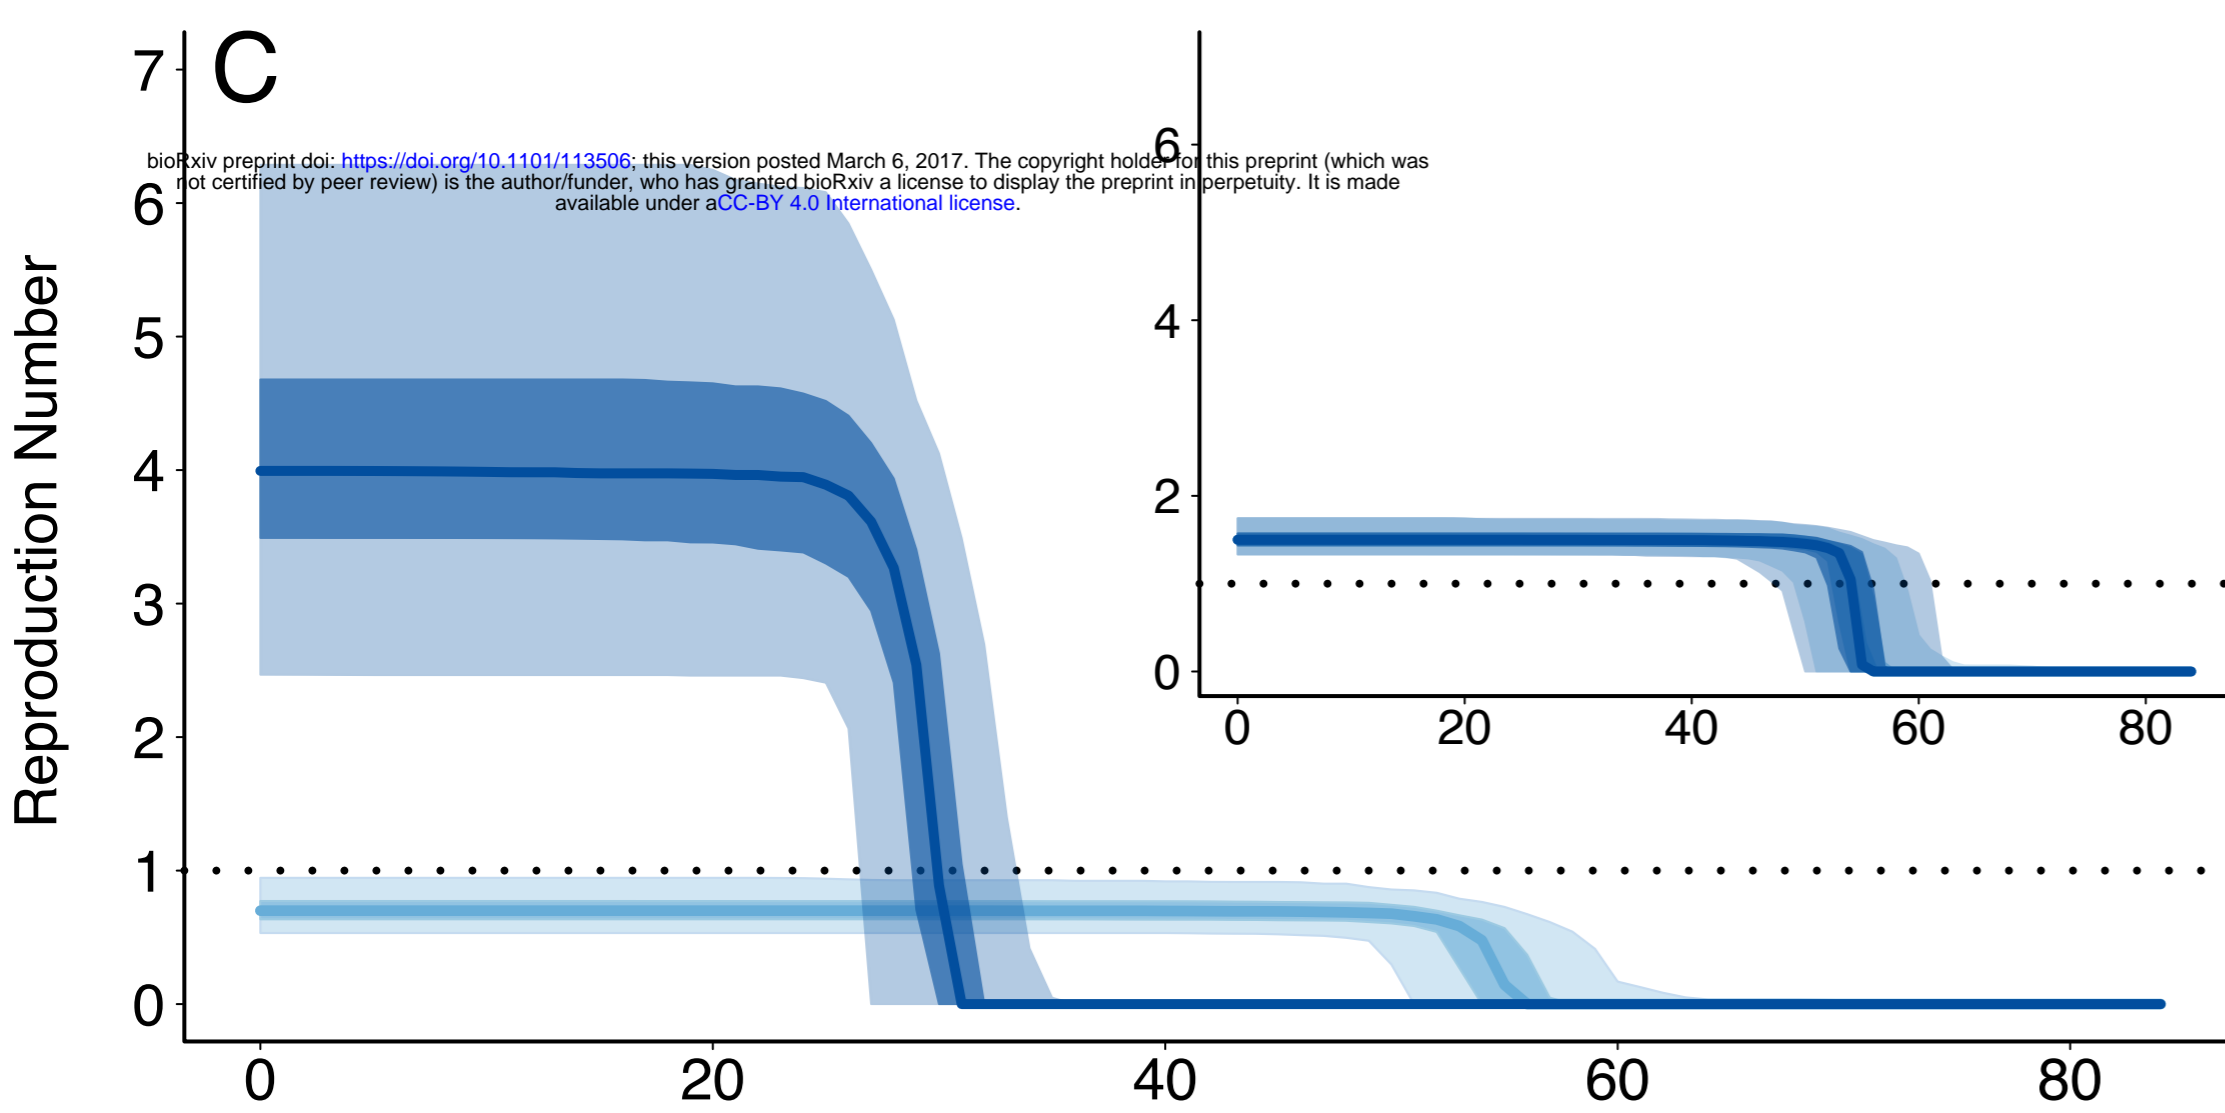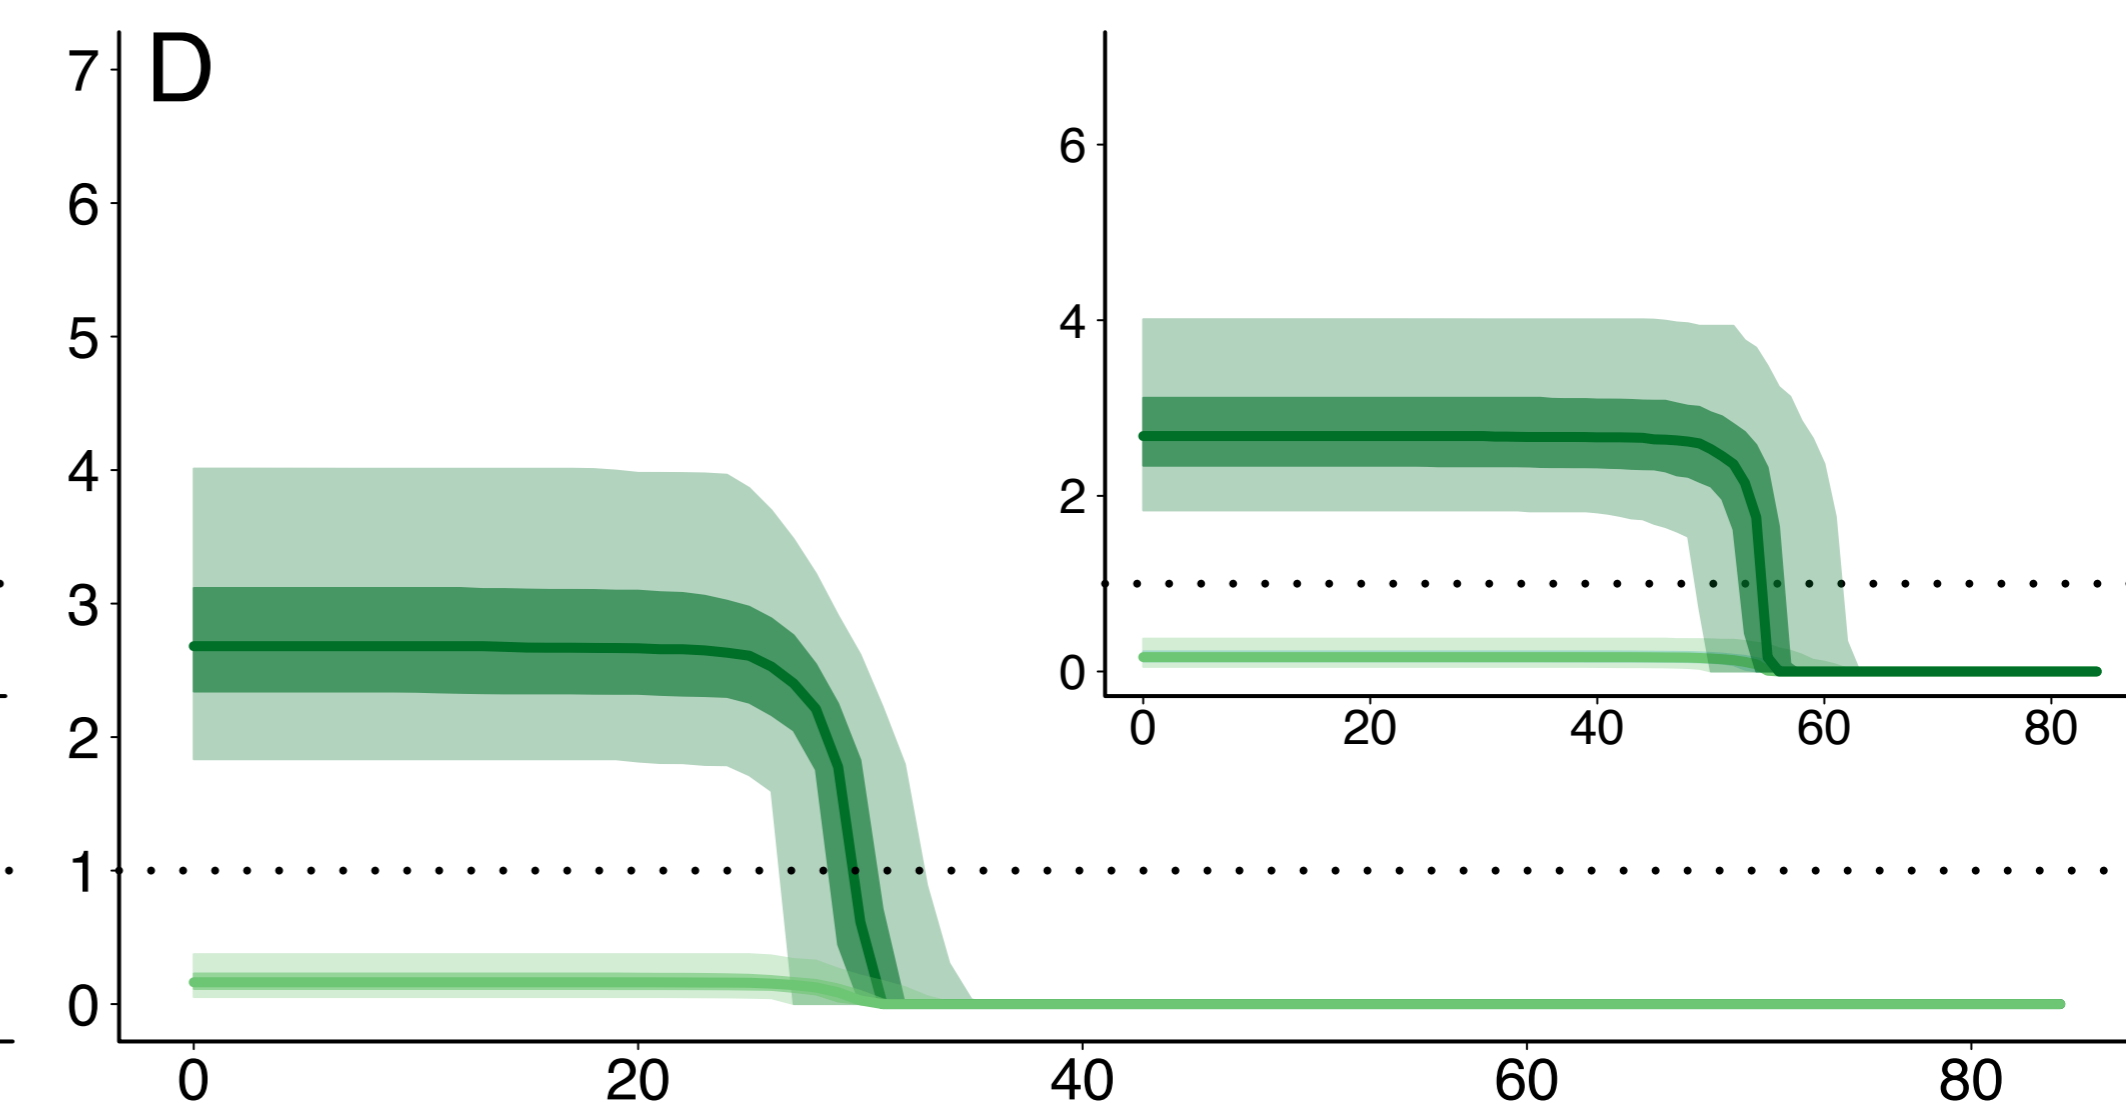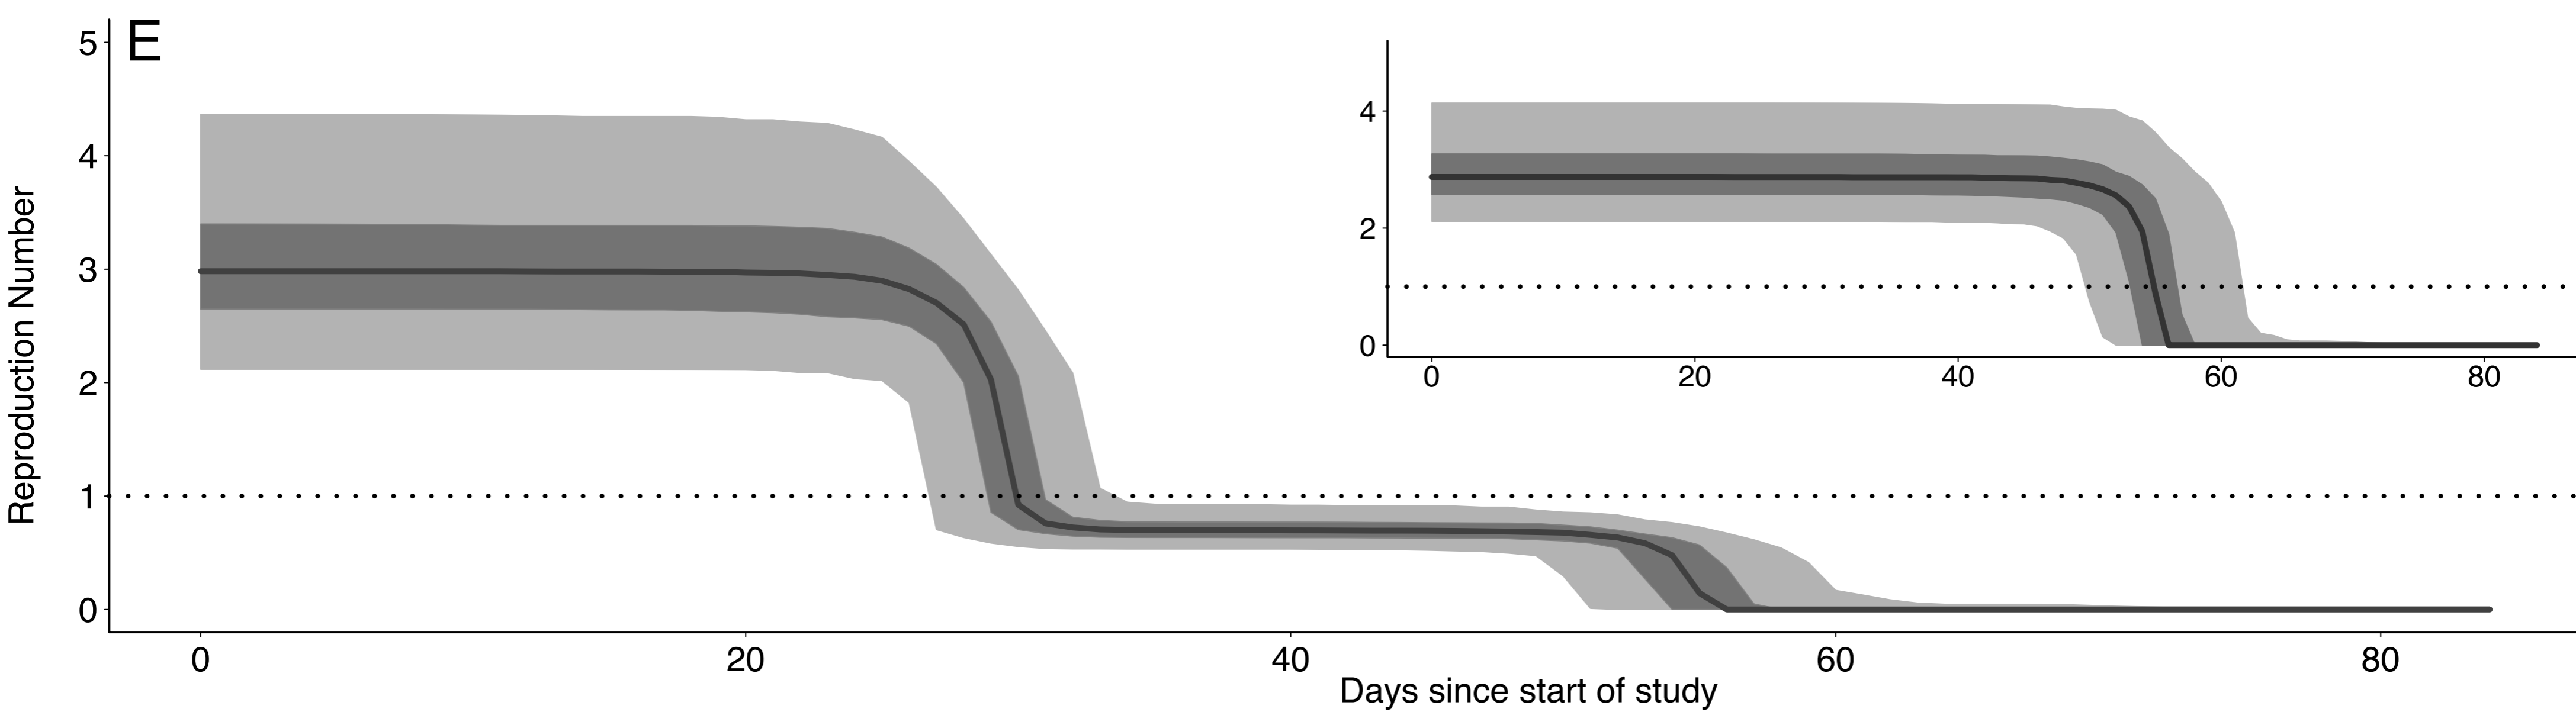

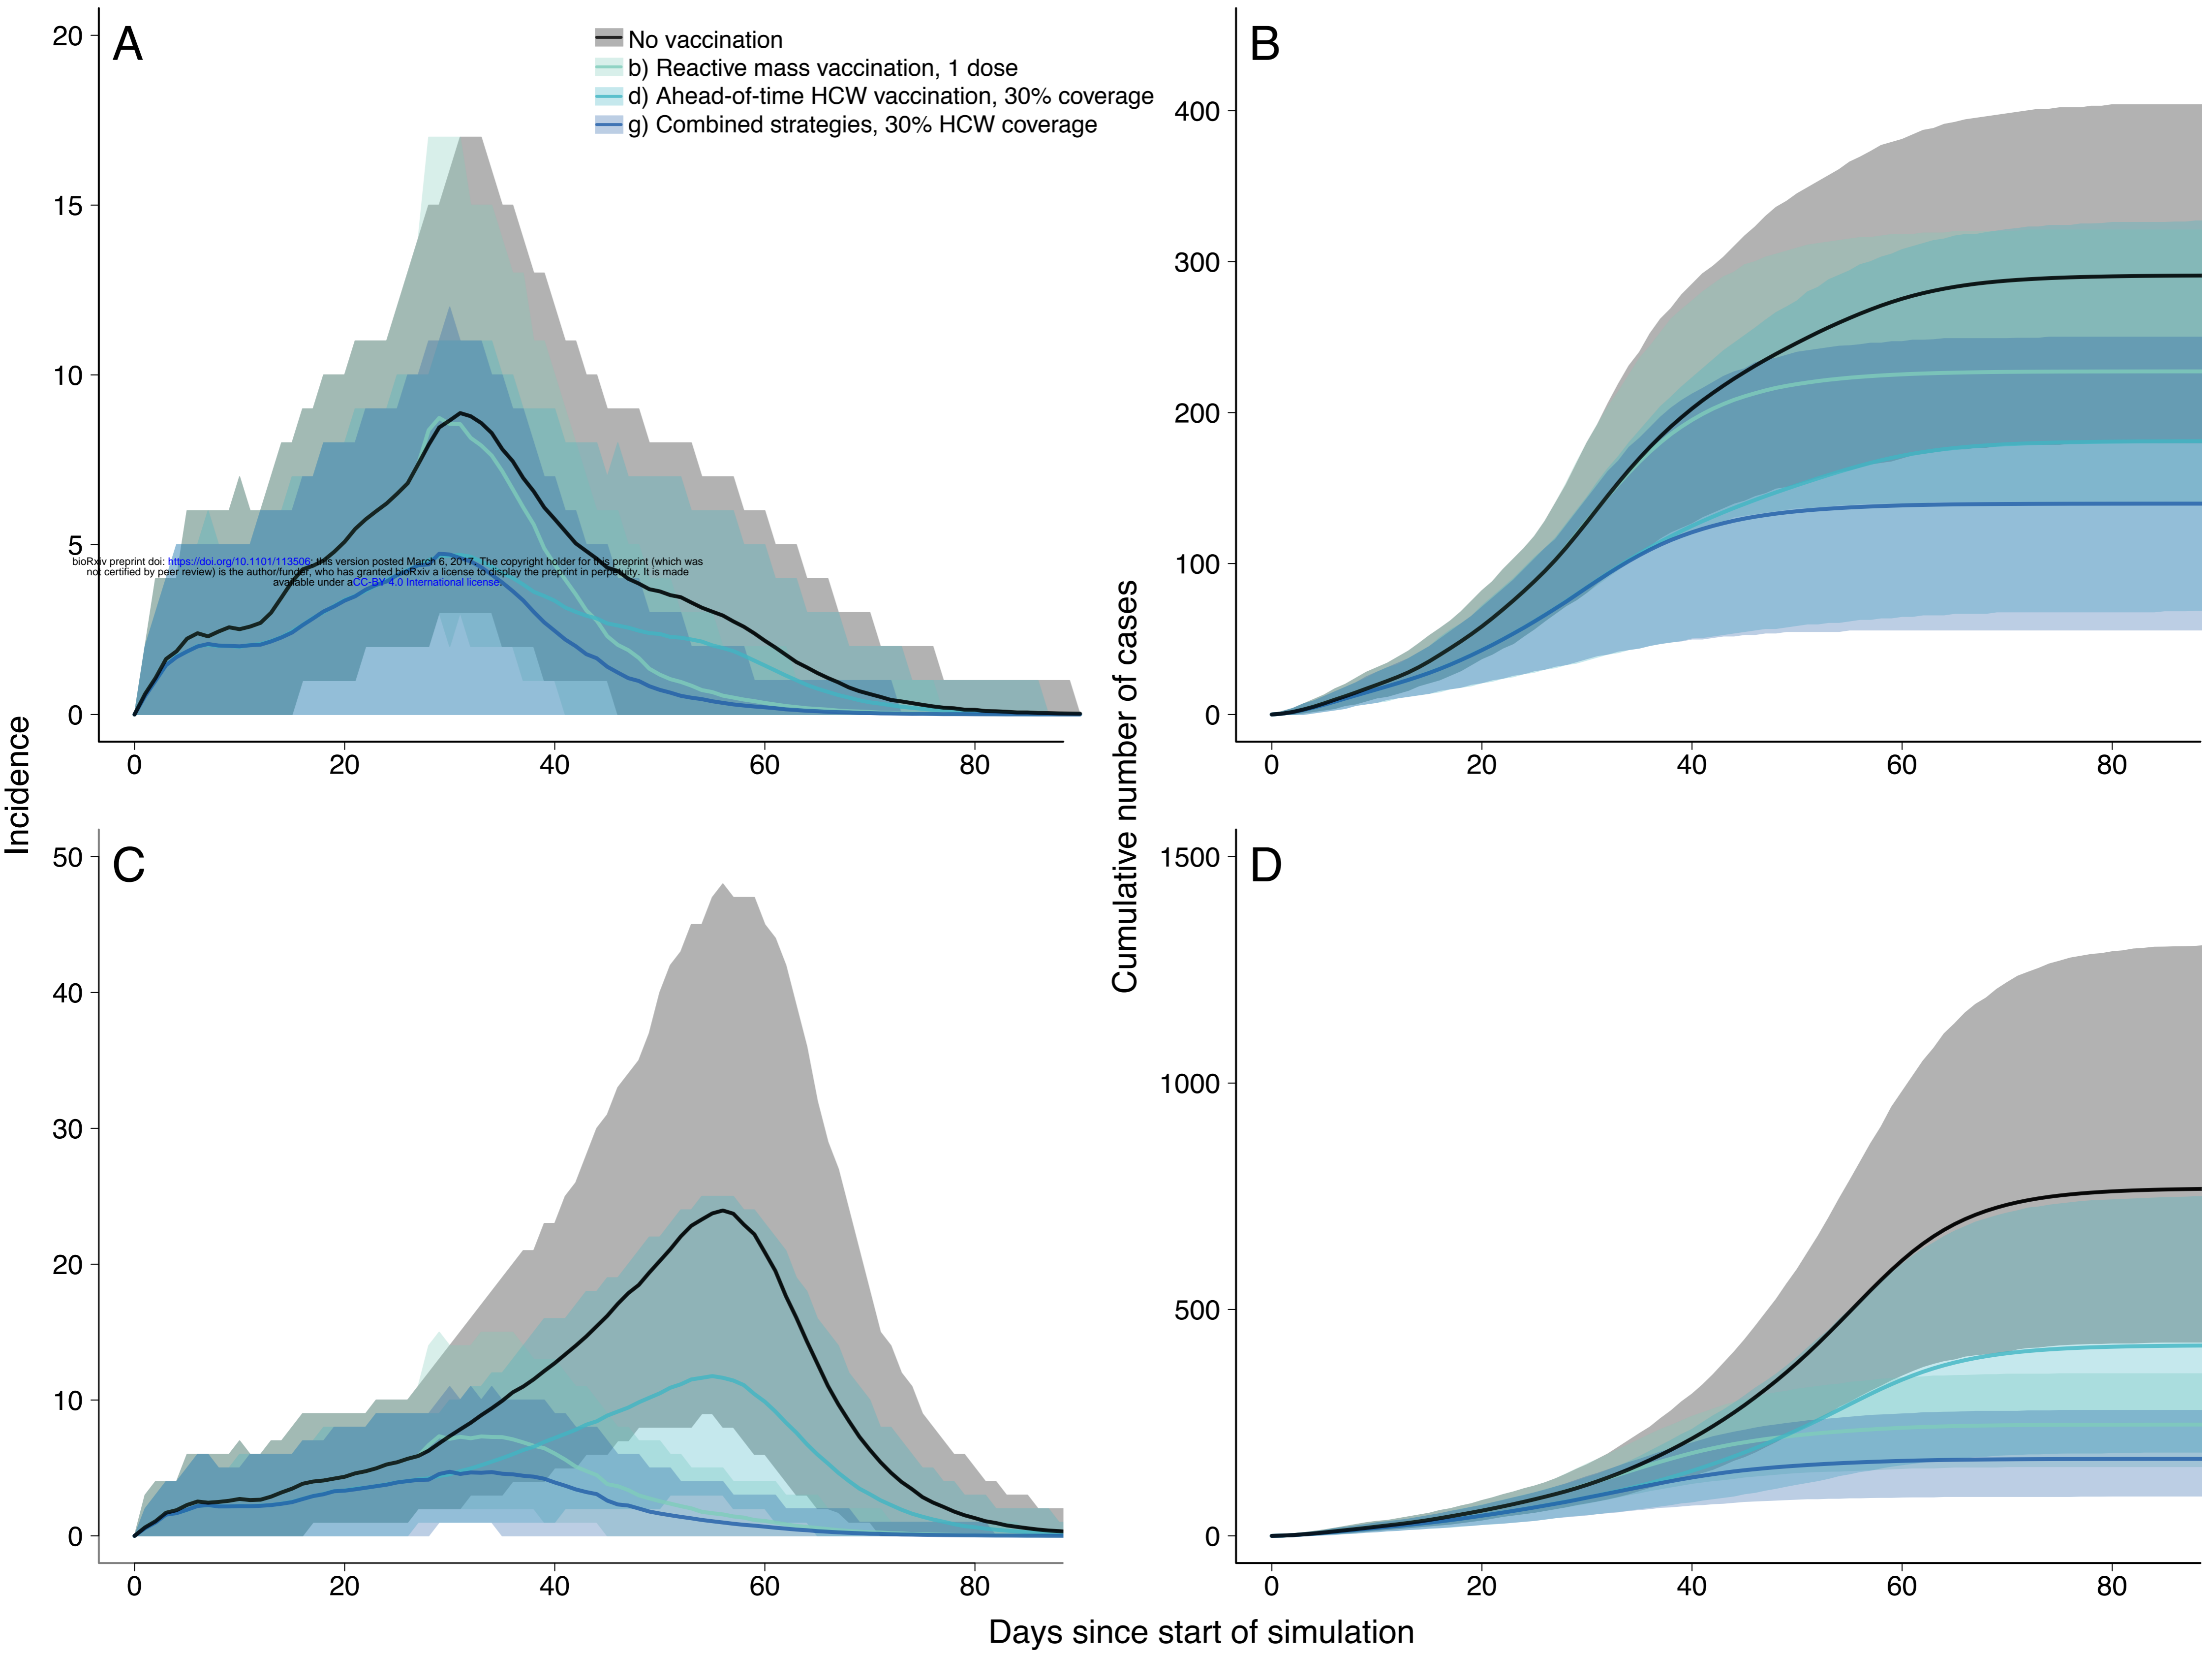

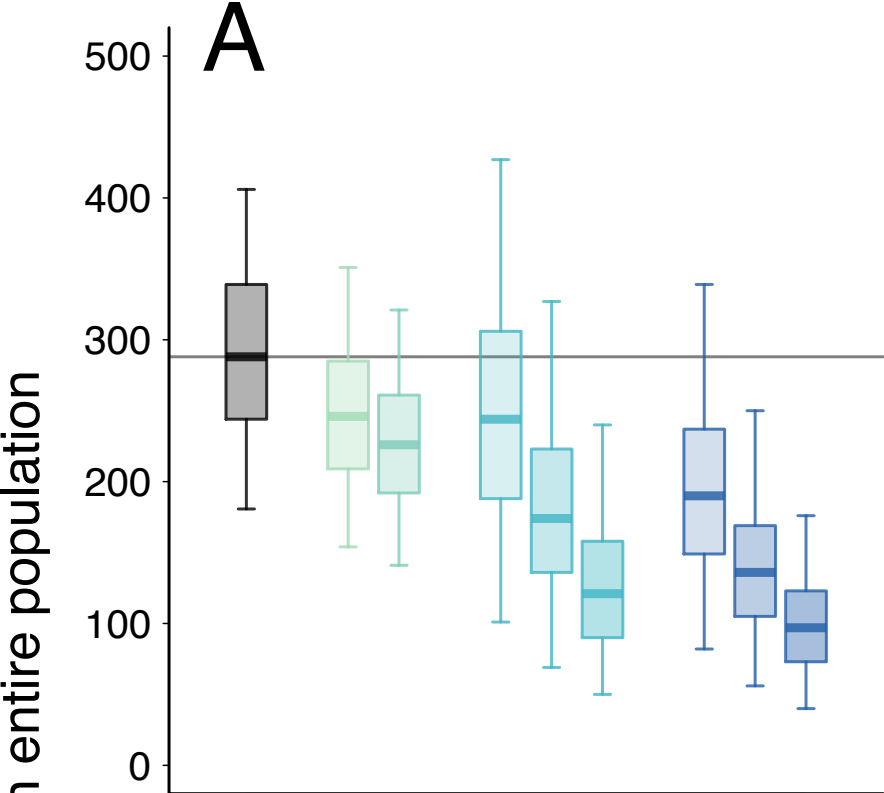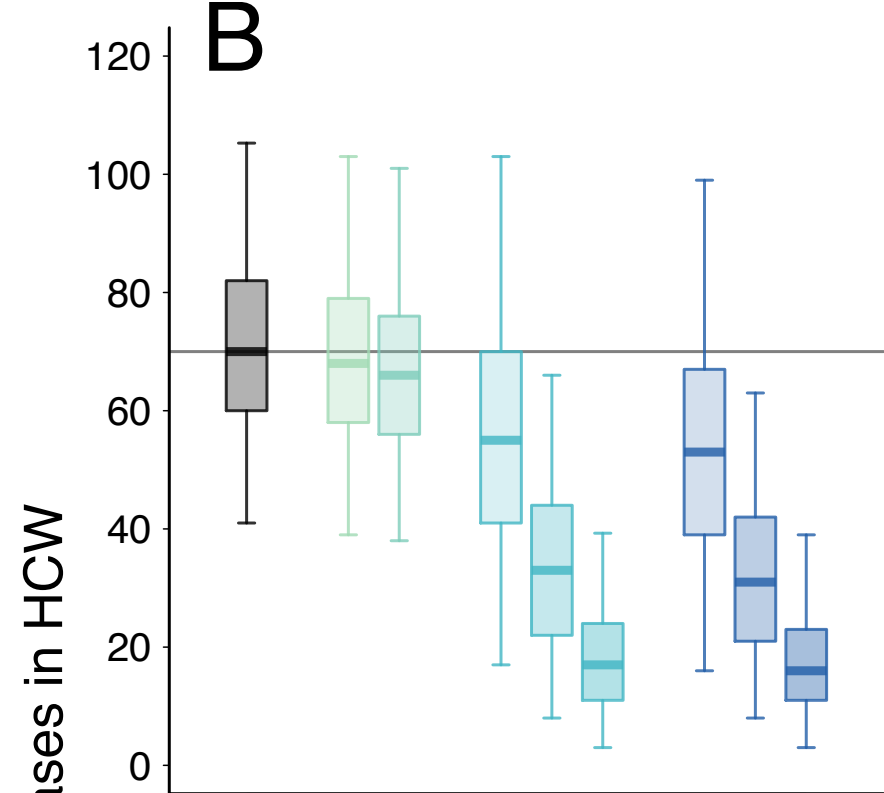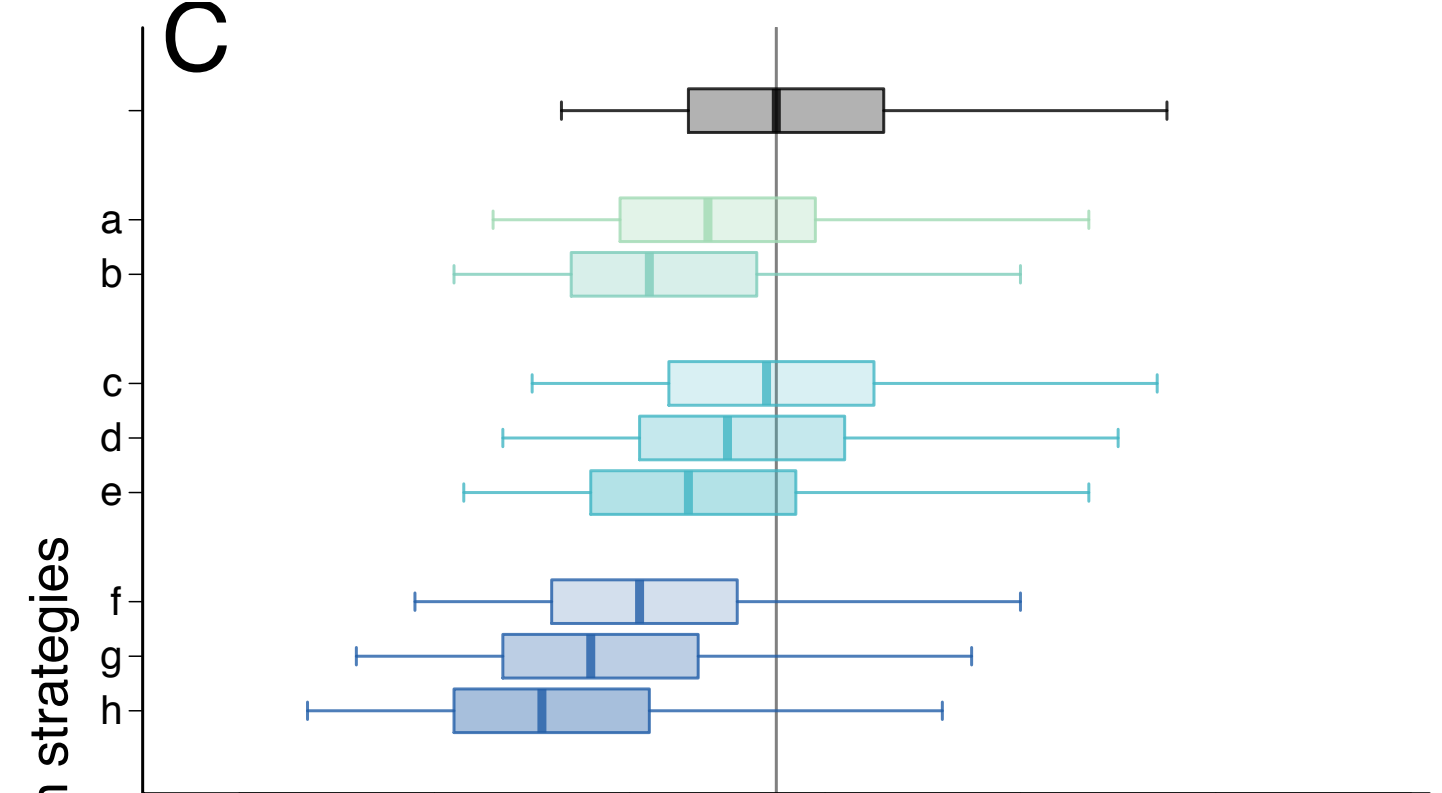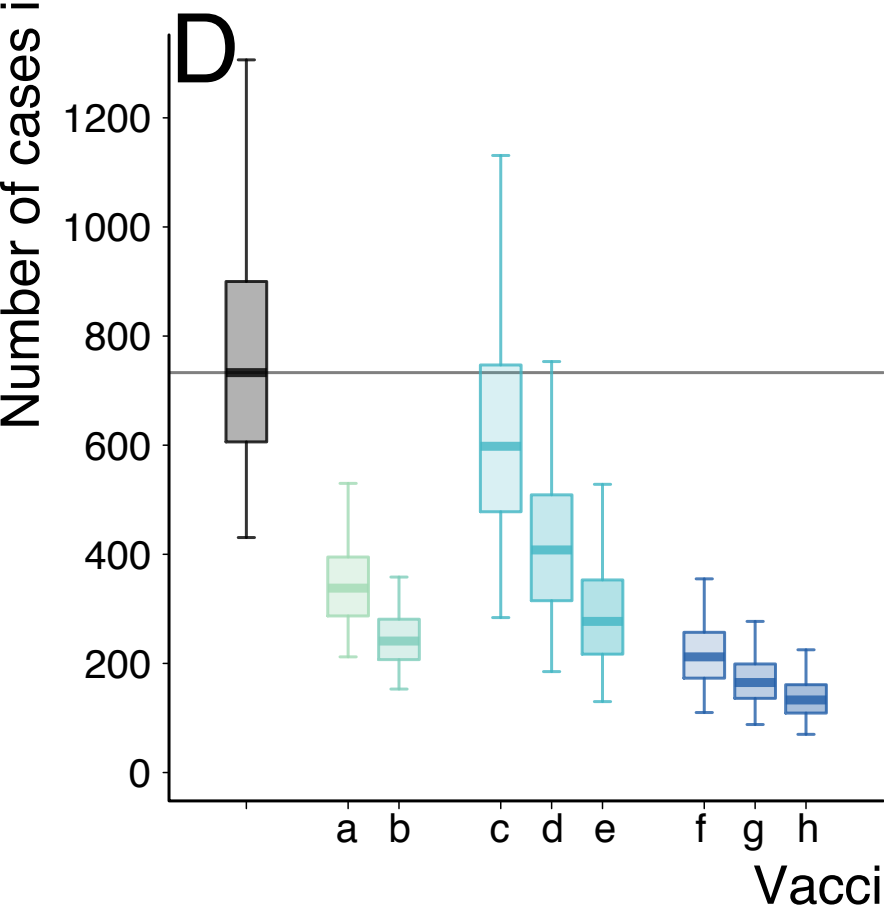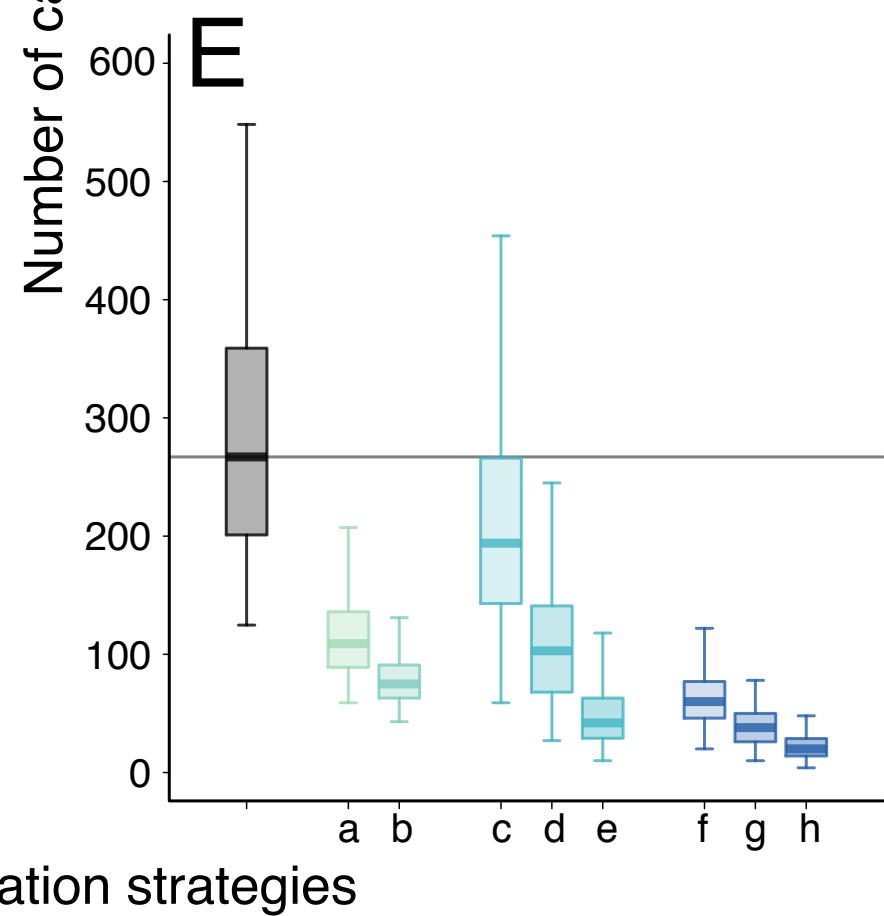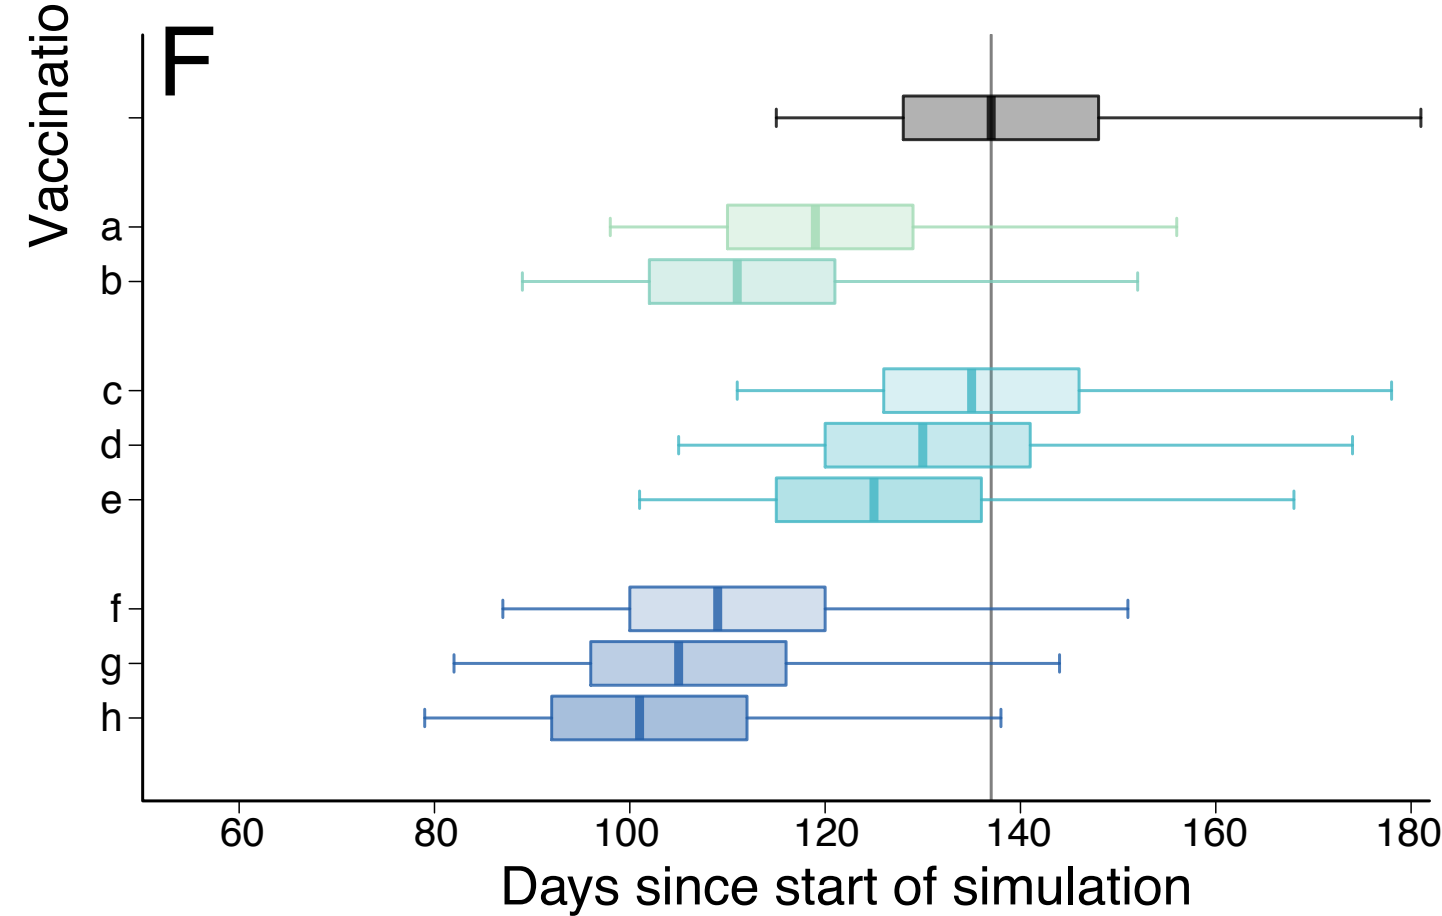

476 **Tables**  
477

| Parameter             | Description                                                   | Fixed value                                                | Posterior median (95% CI) | Reference  |
|-----------------------|---------------------------------------------------------------|------------------------------------------------------------|---------------------------|------------|
| $E_{1cc}(T_0)$        | At $T_0$ , the number of exposed $c$ who were infected by $c$ |                                                            | 13 (5–24)                 |            |
| $E_{1hc}(T_0)$        | At $T_0$ , the number of exposed $c$ who were infected by $h$ |                                                            | 2 (0–7)                   |            |
| $E_{1ch}(T_0)$        | At $T_0$ , the number of exposed $h$ who were infected by $c$ |                                                            | 4 (1–10)                  |            |
| $E_{1hh}(T_0)$        | At $T_0$ , the number of exposed $h$ who were infected by $h$ |                                                            | 4 (0–12)                  |            |
| $I_c(T_0)$            | At $T_0$ , the number of infectious $c$                       |                                                            | 9 (1–24)                  |            |
| $I_h(T_0)$            | At $T_0$ , the number of infectious $h$                       |                                                            | 2 (0–7)                   |            |
| $\epsilon^{-1}$       | Incubation period                                             | 9.5 days                                                   |                           | [11], [34] |
| $\gamma_{death}^{-1}$ | Duration from onset of symptoms to death                      | 10 days                                                    |                           | From data  |
| $\gamma_{recov}^{-1}$ | Duration from onset of symptoms to recovery                   | 18 days                                                    |                           | From data  |
| $\rho_{onset}$        | Proportion of reported cases with onset date                  | 0.9                                                        |                           | From data  |
| $\rho_{death}$        | Proportion of reported cases with death date                  | 0.95                                                       |                           | From data  |
| $\psi_{onset}$        | Overdispersion of reporting proportion of onset date          |                                                            | 0.17 (0.03–0.41)          |            |
| $\psi_{death}$        | Overdispersion of reporting proportion of death date          |                                                            | 0.36 (0.13–0.73)          |            |
| $\tau_p$ or $\tau_b$  | Vaccination rate (prime or boost)                             | Equivalent to 15,000 doses per day                         |                           |            |
| $v_p$ or $v_b$        | Vaccine efficacy, prime or boost.                             | Single dose: $v_p=0.9$ ; Prime-boost: $v_p=0.5, v_b=0.9$ . |                           |            |

478 Table 1. Key parameters relating to transmission, with fixed or estimated values. Details of all  
479 parameters are given in Supplementary Section S4.2.  
480

|                                        |                     | $hh$                          | $ch$             | $hc$                          | $cc$                          | Overall          |
|----------------------------------------|---------------------|-------------------------------|------------------|-------------------------------|-------------------------------|------------------|
| <b>Kikwit scenario</b>                 | $R_0$               | 2.68 (1.83-4.01)              | 0.16 (0.05-0.37) | 3.99 (2.47-6.29)              | 0.70 (0.53-0.95)              | 2.98 (2.11-4.36) |
|                                        | $T_{change}$ (days) | $T_h = 30$ (27-35)            | $T_h$            | $T_h$                         | $T_c = 55$ (50-62)            |                  |
|                                        | shape               | $\alpha_h = 2.20$ (0.23-4.83) | $\alpha_h$       | $\alpha_h$                    | $\alpha_c = 2.49$ (0.21-4.86) |                  |
| <b>Prolonged-transmission scenario</b> | $R_0$               | 2.68 (1.83-4.01)              | 0.16 (0.05-0.37) | 1.50 (1.33-1.75)              | 1.50 (1.33-1.75)              | 2.87 (2.12-4.14) |
|                                        | $T_{change}$ (days) | $T_c = 55$ (50-62)            | $T_c$            | $T_c$                         | $T_c$                         |                  |
|                                        | shape               | $\alpha_h = 2.20$ (0.23-4.83) | $\alpha_h$       | $\alpha_c = 2.49$ (0.21-4.86) | $\alpha_c$                    |                  |

481 Table 2. Values of the reproduction number, time of change in transmission, and shape of the  
482 decrease in transmission. We give values inferred from the Kikwit data, and those used in simulations  
483 in the prolonged-transmission scenario described in Methods. Mean values and 95% CIs are given.  
484 Comparison of the  $R_0$  trajectories is given in Figure 2.

## 485 References

- 486 [1] World Health Organization, "Ebola Situation Report March 30, 2016," no. January,  
487 pp. 1–16, 2016.
- 488 [2] M. Grinnell *et al.*, "Ebola Virus Disease in Health Care Workers — Guinea, 2014,"  
489 *MMWR. Morb. Mortal. Wkly. Rep.*, vol. 64, no. 38, pp. 1083–87, 2015.
- 490 [3] A. Matanock *et al.*, "Ebola Virus Disease Cases Among Health Care Workers Not  
491 Working in Ebola Treatment Units — Liberia , June – August, 2014," *Morb. Mortal.*  
492 *Wkly. Rep.*, vol. 63, pp. 1–5, 2014.
- 493 [4] O. Olu *et al.*, "Epidemiology of Ebola virus disease transmission among health care  
494 workers in Sierra Leone, May to December 2014: a retrospective descriptive  
495 study.," *BMC Infect. Dis.*, vol. 15, no. 1, p. 416, 2015.
- 496 [5] P. H. Kilmarx *et al.*, "Ebola virus disease in health care workers--Sierra Leone,  
497 2014.," *MMWR. Morb. Mortal. Wkly. Rep.*, vol. 63, no. 49, pp. 1168–71, 2014.
- 498 [6] A. S. Khan *et al.*, "The reemergence of Ebola Hemorrhagic Fever, Democratic  
499 Republic of the Congo, 1995," *J. Infect. Dis.*, vol. 179, no. Suppl 1, pp. S76--S86,  
500 1999.
- 501 [7] World Health Organization, "Health worker Ebola infections in Guinea, Liberia  
502 and Sierra Leone - A preliminary report," no. May, pp. 1–16, 2015.
- 503 [8] A. Rosello *et al.*, "Ebola virus disease in the Democratic Republic of the Congo,  
504 1976-2014.," *Elife*, vol. 4, no. November 2014, p. e09015, 2015.
- 505 [9] A. J. Kucharski, A. Camacho, S. Flasche, R. E. Glover, W. J. Edmunds, and S. Funk,  
506 "Measuring the impact of Ebola control measures in Sierra Leone," *Proc. Natl.*  
507 *Acad. Sci.*, vol. 112, no. 46, p. 201508814, 2015.
- 508 [10] A. Camacho, A. J. Kucharski, S. Funk, J. Breman, P. Piot, and W. J. Edmunds,  
509 "Potential for large outbreaks of Ebola virus disease," *Epidemics*, vol. 9, no. 2014,  
510 pp. 70–78, 2014.
- 511 [11] J. Legrand, R. F. Grais, P. Y. Boelle, A. J. Valleron, and A. Flahault, "Understanding  
512 the dynamics of Ebola epidemics.," *Epidemiol. Infect.*, vol. 135, no. 4, pp. 610–21,  
513 2007.
- 514 [12] A. J. Kucharski *et al.*, "Evaluation of the benefits and risks of introducing Ebola  
515 community care centers, Sierra Leone.," *Emerg. Infect. Dis.*, vol. 21, no. 3, pp. 393–  
516 9, 2015.
- 517 [13] W. E. R. Team, "Ebola virus disease in West Africa--the first 9 months of the  
518 epidemic and forward projections.," *N. Engl. J. Med.*, vol. 371, no. 16, pp. 1481–95,  
519 2014.
- 520 [14] S. Merler *et al.*, "Containing Ebola at the Source with Ring Vaccination," *PLoS Negl*  
521 *Trop Dis*, vol. 10, no. 11, p. e0005093, 2016.
- 522 [15] A. J. Kucharski, R. M. Eggo, C. H. Watson, A. Camacho, S. Funk, and W. J. Edmunds,  
523 "Effectiveness of ring vaccination as control strategy for Ebola virus disease,"  
524 *Emerg. Infect. Dis.*, vol. 22, no. 1, pp. 105–108, 2016.
- 525 [16] World Health Organization, "Fact sheet no. 103: Ebola virus disease," *Geneva,*  
526 *Switzerland: World Health Organization*, 2014. [Online]. Available:  
527 <http://www.who.int/mediacentre/factsheets/fs103/en/>.
- 528 [17] A. M. Henao-Restrepo *et al.*, "Efficacy and effectiveness of an rVSV-vectored  
529 vaccine expressing Ebola surface glycoprotein: interim results from the Guinea  
530 ring vaccination cluster-randomised trial," *Lancet*, vol. 386, no. 9996, pp. 857–  
531 866, 2015.
- 532 [18] J. J. Muyembe-Tamfum, M. Kipasa, C. Kiyungu, and R. Colebunders, "Ebola  
533 outbreak in Kikwit, Democratic Republic of the Congo: discovery and control  
534 measures.," *J. Infect. Dis.*, vol. 179 Suppl, no. Suppl 1, pp. S259–S262, 1999.
- 535 [19] S. F. Dowell, R. Mukunu, T. G. Ksiazek, a S. Khan, P. E. Rollin, and C. J. Peters,  
536 "Transmission of Ebola hemorrhagic fever: a study of risk factors in family  
537 members, Kikwit, Democratic Republic of the Congo, 1995. Commission de Lutte

- 538            contre les Epidémies à Kikwit,” *J. Infect. Dis.*, vol. 179 Suppl, pp. S87–S91, 1999.
- 539    [20]    O. Tomori *et al.*, “Serologic Survey among Hospital and Health Center Workers  
540            during the Ebola Hemorrhagic Fever Outbreak in Kikwit, Democratic Republic of  
541            the Congo, 1995 formed by coating polyvinyl chloride microtiter plates  
542            overnight,” *J. Infect. Dis.*, vol. 179, no. Suppl 1, pp. 98–101, 1999.
- 543    [21]    Unité de pilotage du DSRP Ministère du Plan RDC, “Monographie De La Province  
544            Du Nord- Kivu,” 2005.
- 545    [22]    Statics Sierra Leone, “Sierra Leone 2004 Population and Housing Census,” no.  
546            March, pp. 1–16, 2016.
- 547    [23]    Institut National de la Statistique de Guinée, “2014 Recensement national de la  
548            population,” pp. 1–15, 2014.
- 549    [24]    Government of the Republic of Liberia, “2008 National Population and Housing  
550            Census,” *Popul. (English Ed.*, no. June, 2008.
- 551    [25]    M. Senga *et al.*, “Factors underlying Ebola virus infection among health workers,  
552            Kenema, Sierra Leone, 2014-2015,” *Clin. Infect. Dis.*, vol. 63, no. 4, pp. 454–459,  
553            2016.
- 554    [26]    C. Rivers, “Data for the 2014 Ebola Outbreak in West Africa,” 2014. [Online].  
555            Available: <https://github.com/cmriivers/ebola>.
- 556    [27]    A. a King, M. Domenech de Celles, F. M. G. Magpantay, and P. Rohani, “Avoidable  
557            errors in the modelling of outbreaks of emerging pathogens, with special  
558            reference to Ebola,” *Proc. R. Soc. B Biol. Sci.*, vol. 282, pp. 20150347–20150347,  
559            2015.
- 560    [28]    G. O. Roberts and J. S. Rosenthal, “Examples of adaptive MCMC,” *J. Comput. Graph.  
561            Stat.*, vol. 18, no. 2, pp. 349–367, 2009.
- 562    [29]    C. Andrieu, N. De Freitas, A. Doucet, and M. I. Jordan, “An introduction to MCMC  
563            for machine learning,” *Mach. Learn.*, vol. 50, no. 1–2, pp. 5–43, 2003.
- 564    [30]    C. Althaus, “Estimating the Reproduction Number of Ebola Virus (EBOV) During  
565            the 2014 Outbreak in West Africa,” *PLOS Curr. Outbreaks.*, no. Sep 2 . Edition 1.,  
566            2014.
- 567    [31]    A. Camacho *et al.*, “Temporal Changes in Ebola Transmission in Sierra Leone and  
568            Implications for Control Requirements: a Real-time Modelling Study,” *PLoS Curr.*,  
569            vol. February, no. 10; 7:, 2015.
- 570    [32]    H. Shoman, E. Karafillakis, and S. Rawaf, “The link between the West African  
571            Ebola outbreak and health systems in Guinea, Liberia and Sierra Leone: a  
572            systematic review,” *Global. Health.*, vol. 13, no. 1, p. 1, 2017.
- 573    [33]    D. Petit, E. Sondorp, S. Mayhew, M. Roura, and B. Roberts, “Implementing a Basic  
574            Package of Health Services in post-conflict Liberia: Perceptions of key  
575            stakeholders,” *Soc. Sci. Med.*, vol. 78, no. 1, pp. 42–49, 2013.
- 576    [34]    World Health Organization, “Ebola virus disease,” *World Heal. Organ.*, p. 1, 2015.
- 577
